# Supplementary material for: Design of functionalized luminescent MOF sensor for the precise monitoring of tuberculosis drug and neonicotinoid pesticide from human body-fluids and food samples to protect health and environment
Source: Royal Society of Chemistry journal article supplement (doi:10.1039/d3tc03712f), 2023-12-06
Supplement: d3tc03712f1.pdf [file d3tc03712f1.pdf]

**Supporting Information for:**

**Design of functionalized luminescent MOF sensor for precise monitoring of tuberculosis drug and neonicotinoid pesticide from human body-fluids and food samples to protect health and environment**

*Abhijeet Rana,<sup>a</sup> Nazir Ud Din Mir,<sup>a</sup> Arpa Banik,<sup>b</sup> Ananya Hazra,<sup>a</sup> and Shyam Biswas<sup>a\*</sup>*

<sup>a</sup> Department of Chemistry, Indian Institute of Technology Guwahati, Guwahati, 781039, Assam, India.

<sup>b</sup> Department of Chemistry, Indian Institute of Science Educational and Research, Berhampur, 760003, Odisha, India

\*Corresponding author. Tel: 91-3612583309, Fax: 91-3612582349. E-mail address: sbiswas@iitg.ac.in

## Materials and Characterization Methods:

The linker 2-(((2-hydroxy naphthalene-1-yl)methyl)amino)terephthalic acid ( $H_2L$ ) was synthesized according to the previously reported procedure.<sup>1</sup> All other required chemicals were purchased from commercial sources and used without further purification. The Attenuated Total Reflectance Infrared (ATR-IR) spectra were recorded using PerkinElmer UATR Two at the ambient condition in the region  $400-4000\text{ cm}^{-1}$ . The notations used for the characterization of the bands are broad (br), strong (s), very strong (vs), medium (m), weak (w) and shoulder (sh). Thermogravimetric (TA) experiments were conducted with a heating rate of  $4\text{ }^\circ\text{C min}^{-1}$  oxygen atmosphere in PerkinElmer, TGA 4000, thermogravimetric analyser thermogravimetric analyser. Rigaku Smartlab X-ray diffractometer (model TTRAX III) with Cu-K $\alpha$  radiation ( $\lambda = 1.54056\text{ \AA}$ ), 40 kV of operating voltage and 125 mA of operating current was used to collect all PXRD data. The specific surface area for  $N_2$  sorption was calculated on a Quantachrome Autosorb iQMP gas sorption analyzer at  $-196\text{ }^\circ\text{C}$ . FE-SEM and EDX images were collected with a Zeiss (Sigma 300) scanning electron microscope. The DICVOL program incorporated within STOE's WinXPow software package was used to determine the lattice parameters. Dimond 5.0 was used for drawing the crystal structure of **1'**. Fluorescence sensing studies were performed with a HORIBA JOBIN YVON Fluoromax-4 spectrofluorometer. Fluorescence lifetimes were measured using Picosecond Time-resolved and Steady State Luminescence Spectrometer on an Edinburg Instruments Lifespec II & FSP 920 instrument. Solution state UV-Vis spectra were measured using PerkinElmer Lamda 365 + instrument. Automated ultra-high vacuum X-ray photoelectron spectroscopy of **1'** was carried out using PHI 5000 versa probe III spectrophotometer.

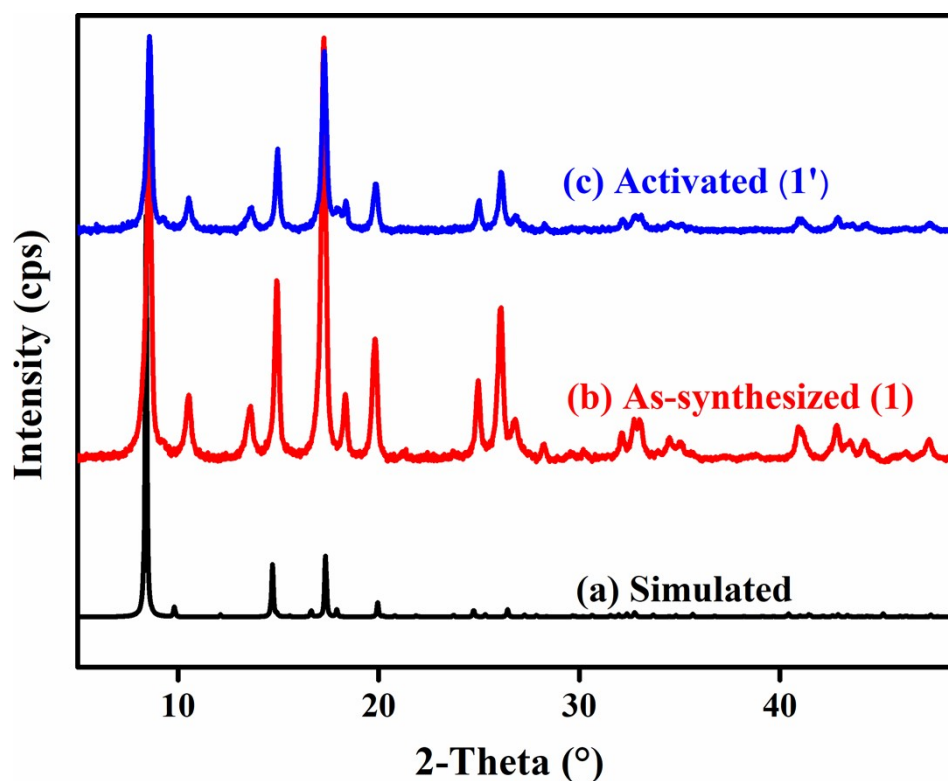

**Figure S1.** The PXRD patterns of simulated MIL-53 (black), as-synthesized **1** (red) and activated **1'** (blue).

**Table S1.** Unit cell parameters of simulated MIL-53(Al) and **1**.

| Compound Name       | [Al(OH)(L)]·0.5H <sub>2</sub> O ( <b>1</b> )<br>(this work) | MIL-53(Al)<br>(reported)    |
|---------------------|-------------------------------------------------------------|-----------------------------|
| Crystal System      | Orthorhombic P                                              | Orthorhombic P              |
| a ≠ b ≠ c (Å)       | 16.654 ≠ 12.890 ≠ 6.610 (9)                                 | 16.675 ≠ 12.813 ≠ 6.608 (2) |
| α = β = γ (°)       | 90                                                          | 90                          |
| V (Å <sup>3</sup> ) | 1419.1 (17)                                                 | 1411.8 (2)                  |
| Radiation           | Cu Kα1                                                      | Cu Kα1                      |

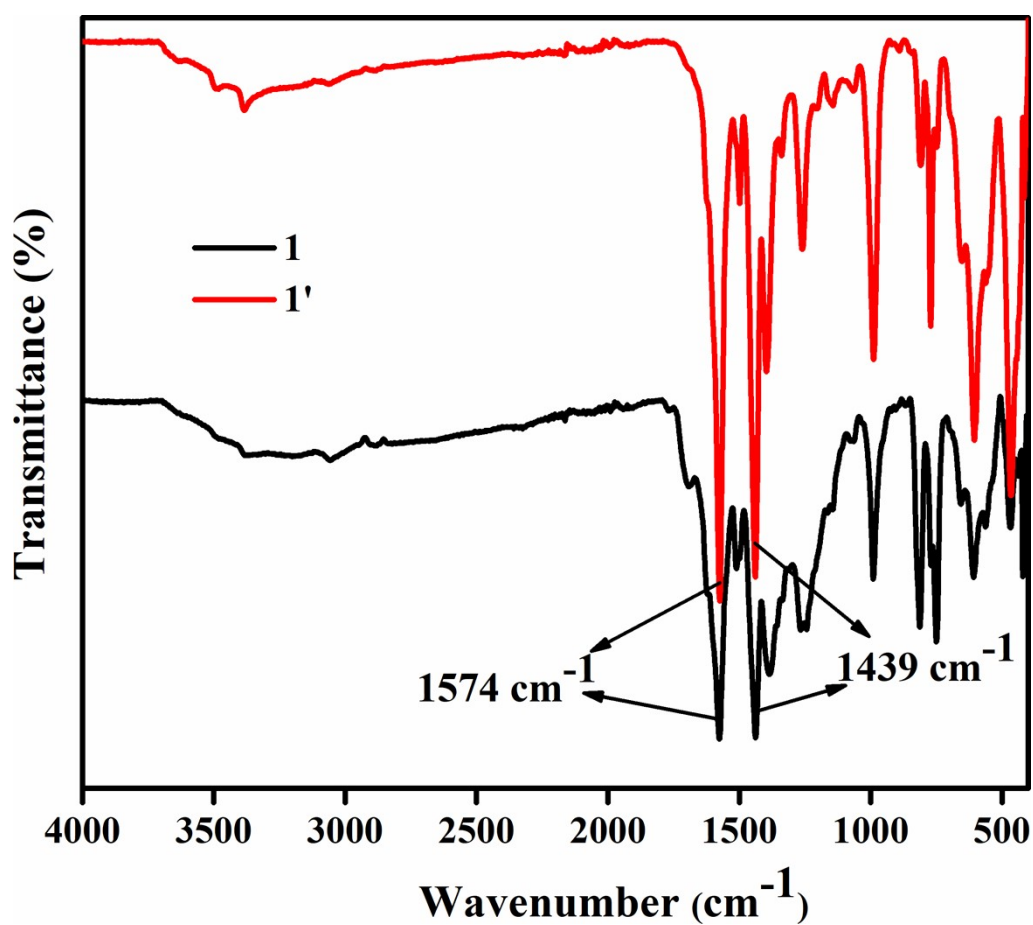

**Figure S2.** ATR-IR spectrum of **1** (red) and **1'**(black).

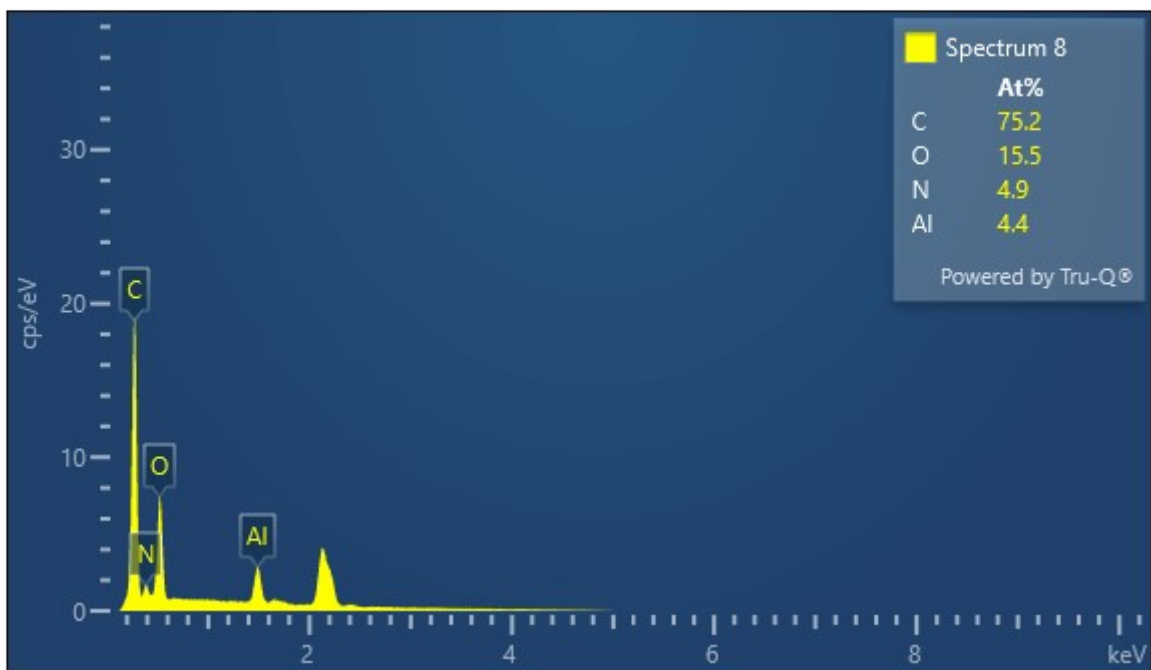

**Figure S3.** EDX spectrum of 1'.

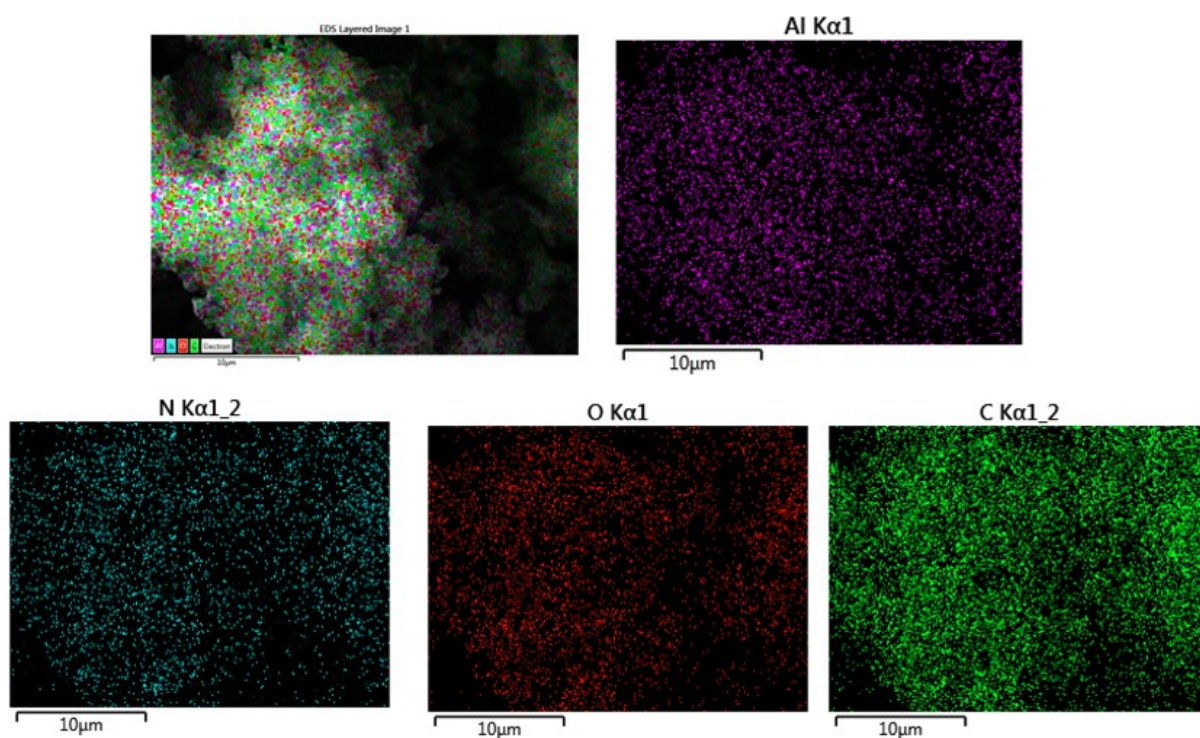

**Figure S4.** EDX elemental mapping of 1'.

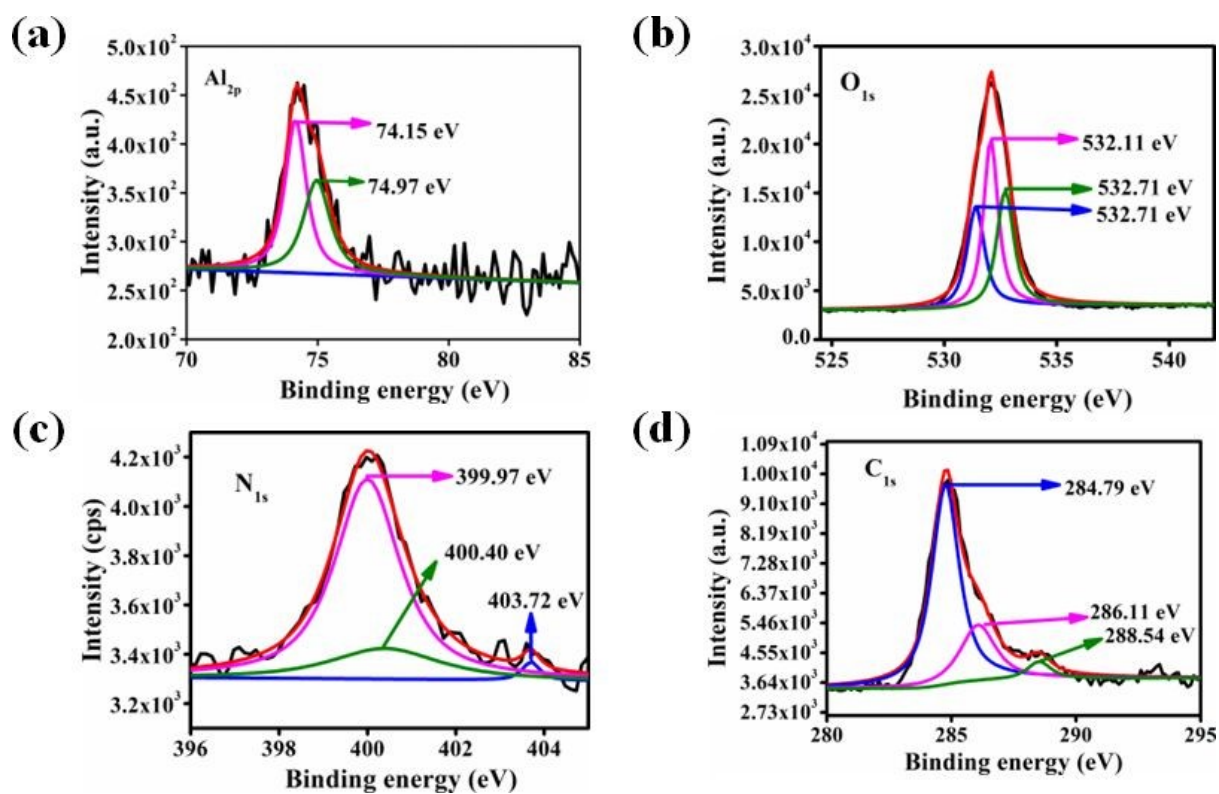

Figure S5. XPS spectra of the elements of 1'.

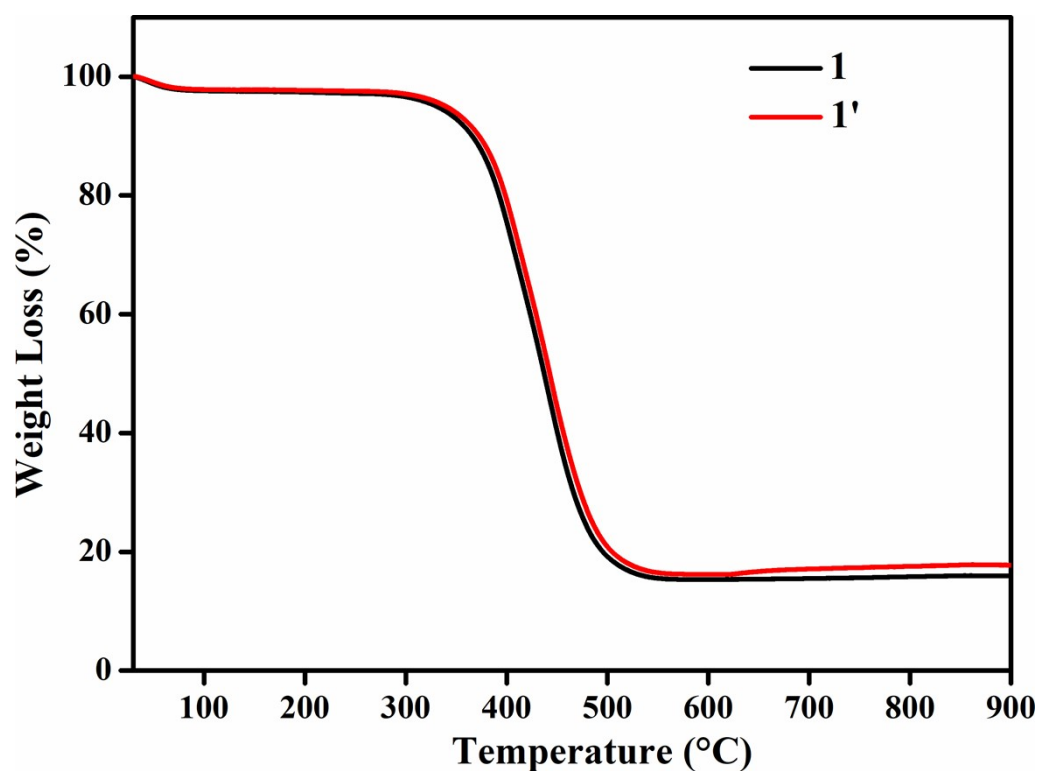

Figure S6. Thermogravimetric analysis of 1 (red) and 1' (black).

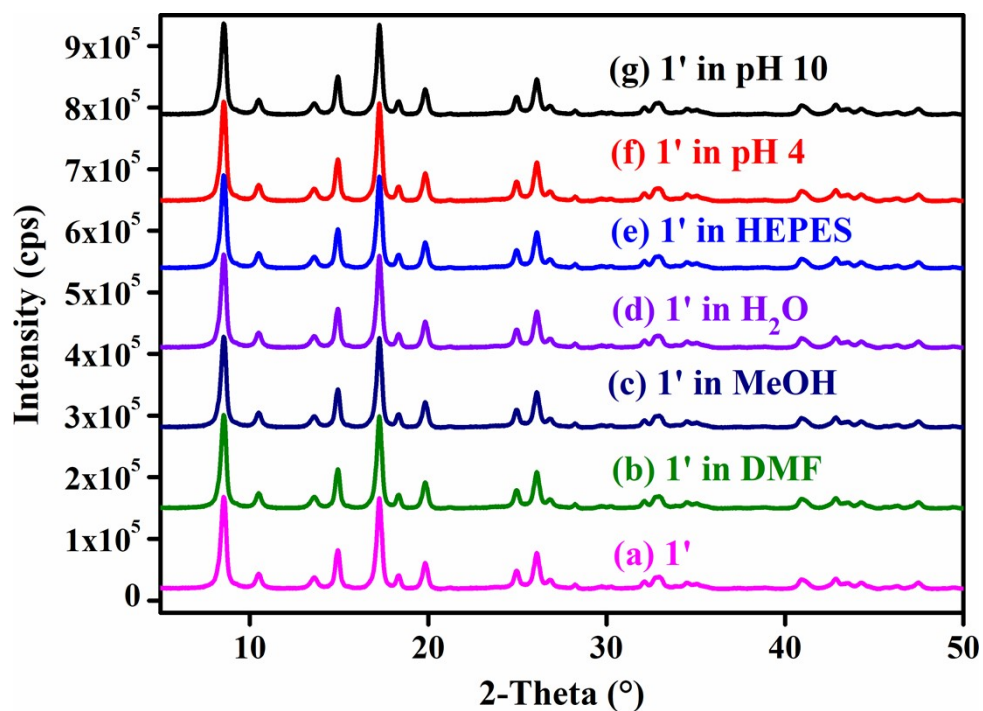

**Figure S7.** PXRD pattern of 1' after stirring in different organic solvents and pH media for 24 h.

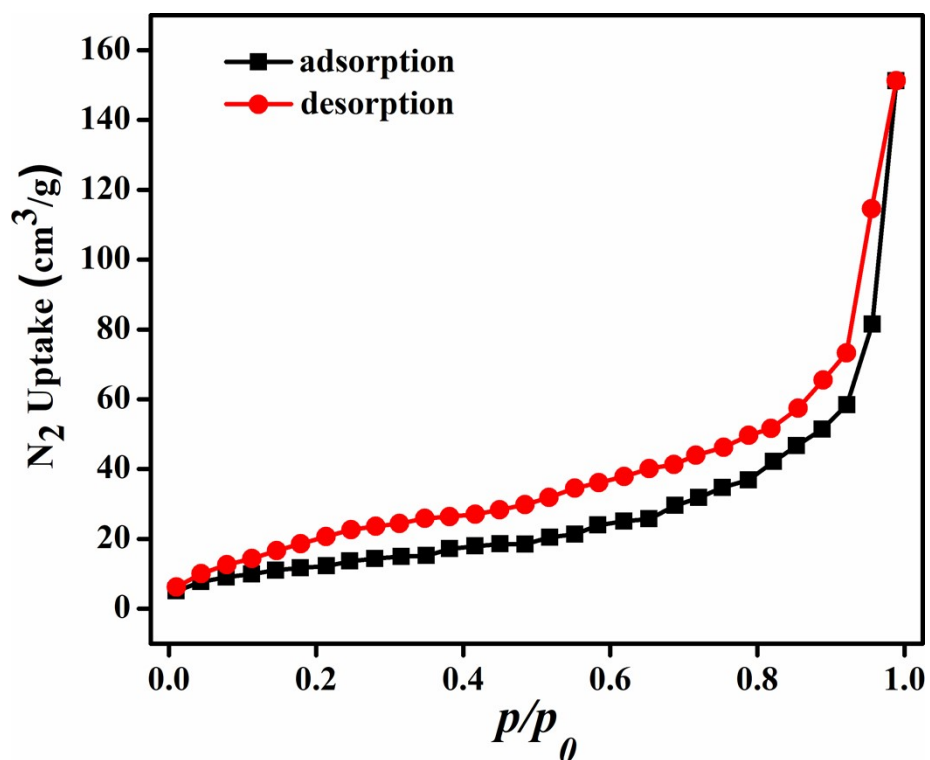

**Figure S8.** N<sub>2</sub> sorption isotherm of 1'.

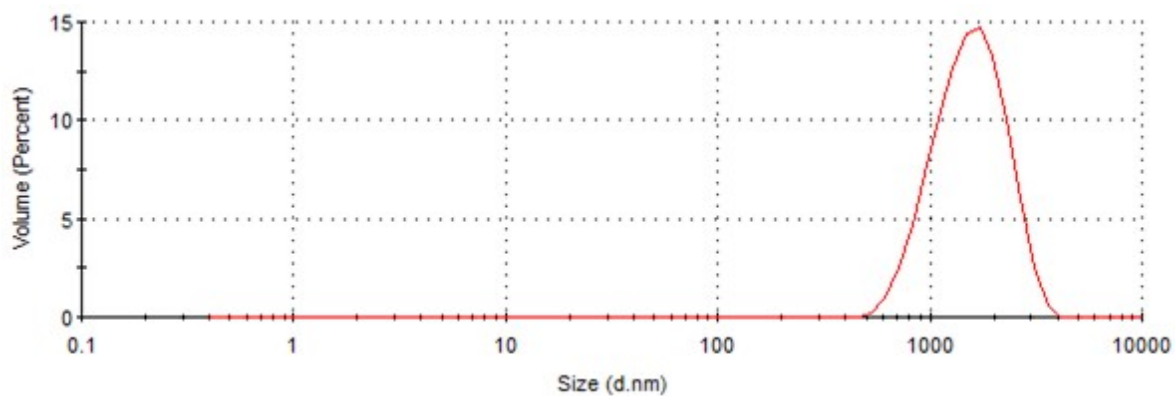

**Figure S9.** Particle size distribution curve of **1'** in aqueous medium from DLS measurement.

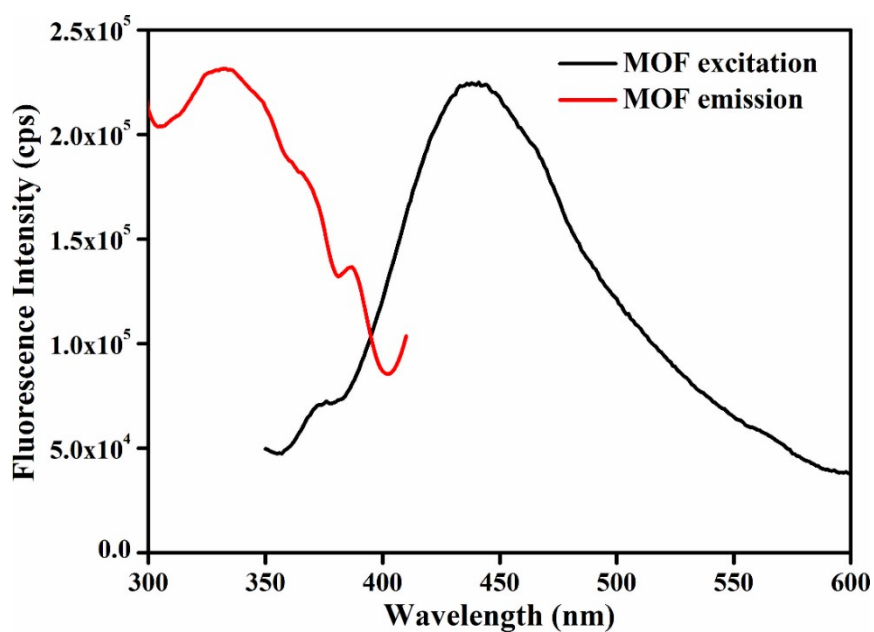

**Figure S10.** Excitation and emission spectra of **1'** in water.

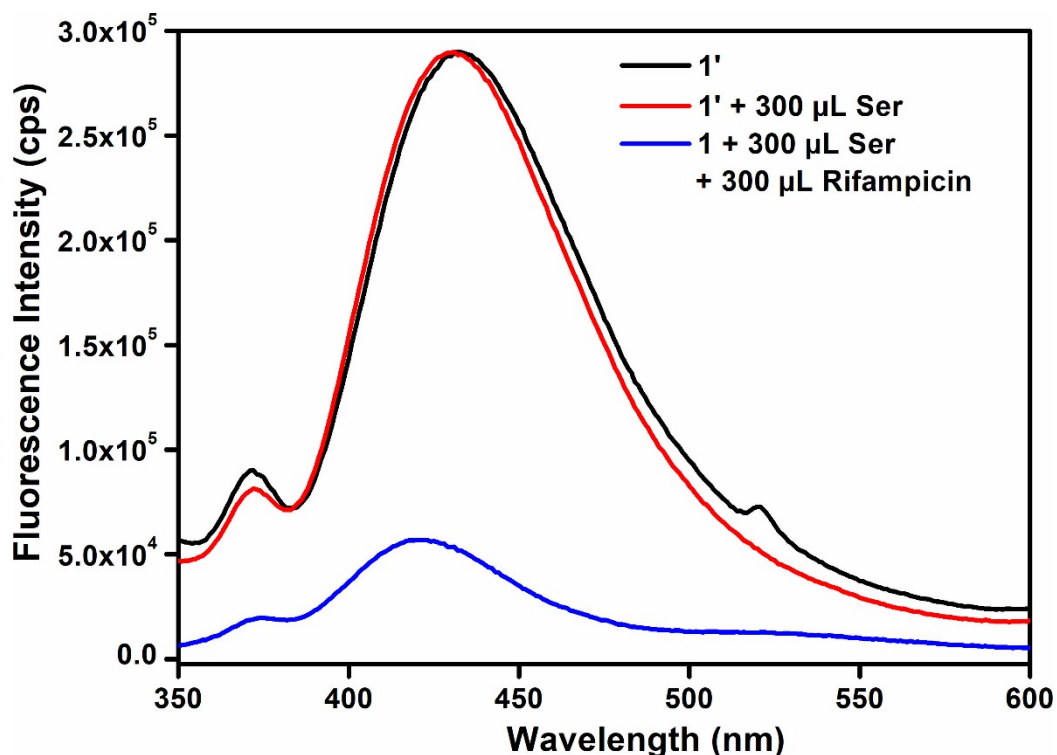

**Figure S11.** Fluorescence emission intensity of **1'** (black), **1'** in the presence of 300 μL of 1 mM aqueous serine solution (red) and **1'** in the presence of both 300 μL of 1 mM aqueous serine and rifampicin solution (blue).

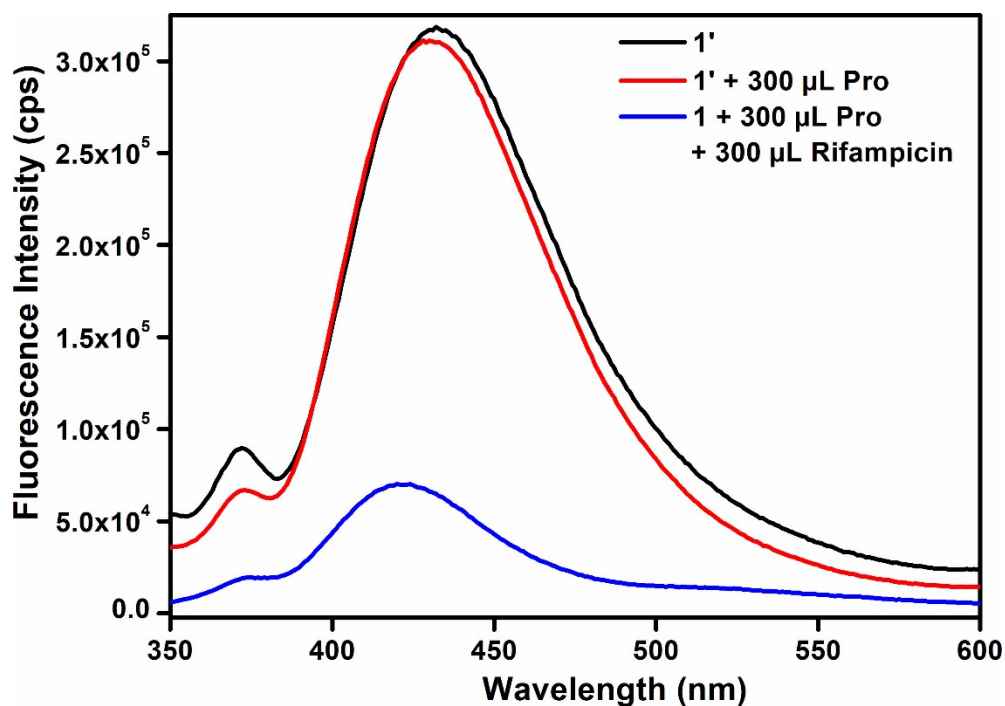

**Figure S12.** Fluorescence emission intensity of **1'** (black), **1'** in the presence of 300 μL of 1 mM aqueous proline solution (red) and **1'** in the presence of both 300 μL of 1 mM aqueous proline and rifampicin solution (blue).



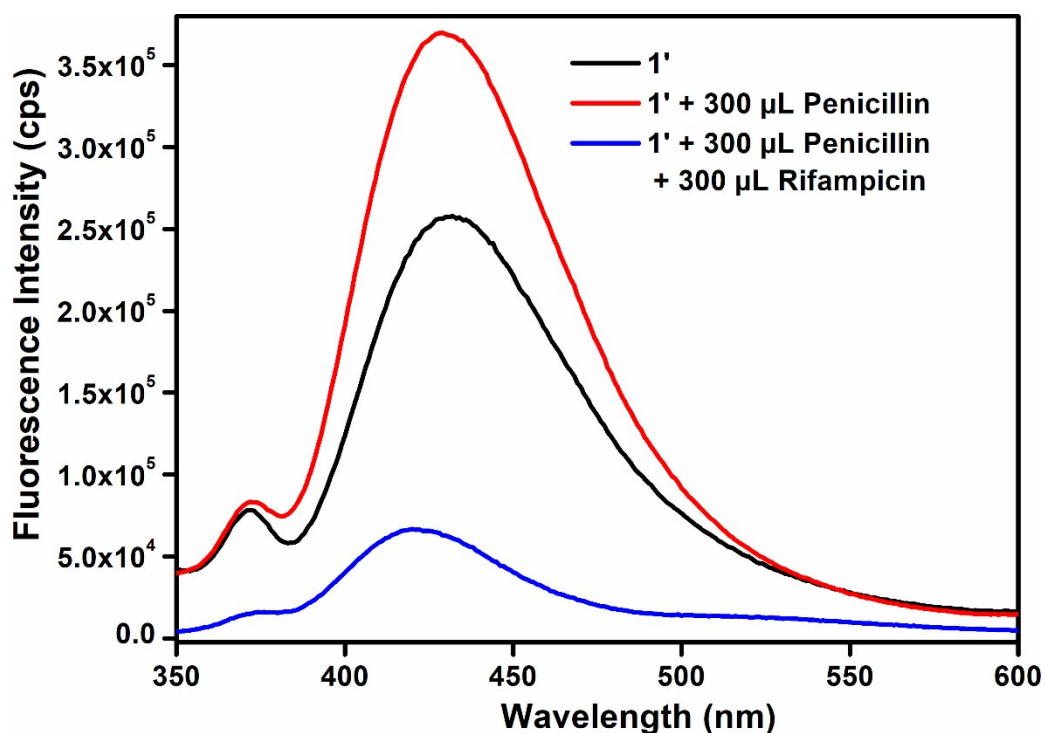

**Figure S13.** Fluorescence emission intensity of **1'** (black), **1'** in the presence of 300  $\mu\text{L}$  of 1 mM aqueous penicillin solution (red) and **1'** in the presence of both 300  $\mu\text{L}$  of 1 mM aqueous penicillin and rifampicin solution (blue).

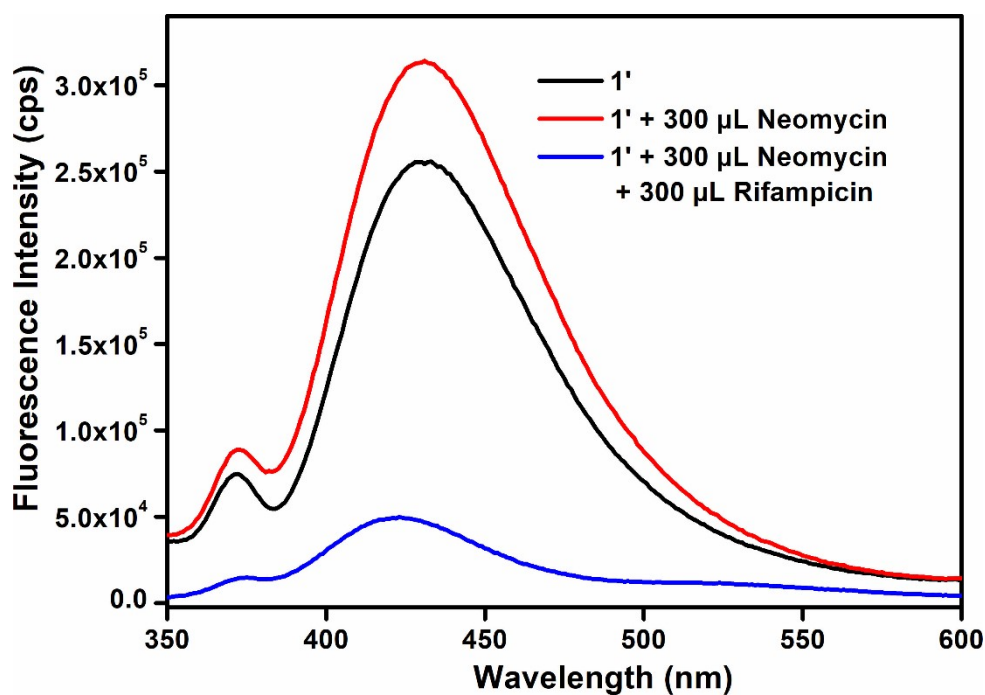

**Figure S14.** Fluorescence emission intensity of **1'** (black), **1'** in the presence of 300  $\mu\text{L}$  of 1 mM aqueous neomycin solution (red) and **1'** in the presence of both 300  $\mu\text{L}$  of 1 mM aqueous neomycin and rifampicin solution (blue).

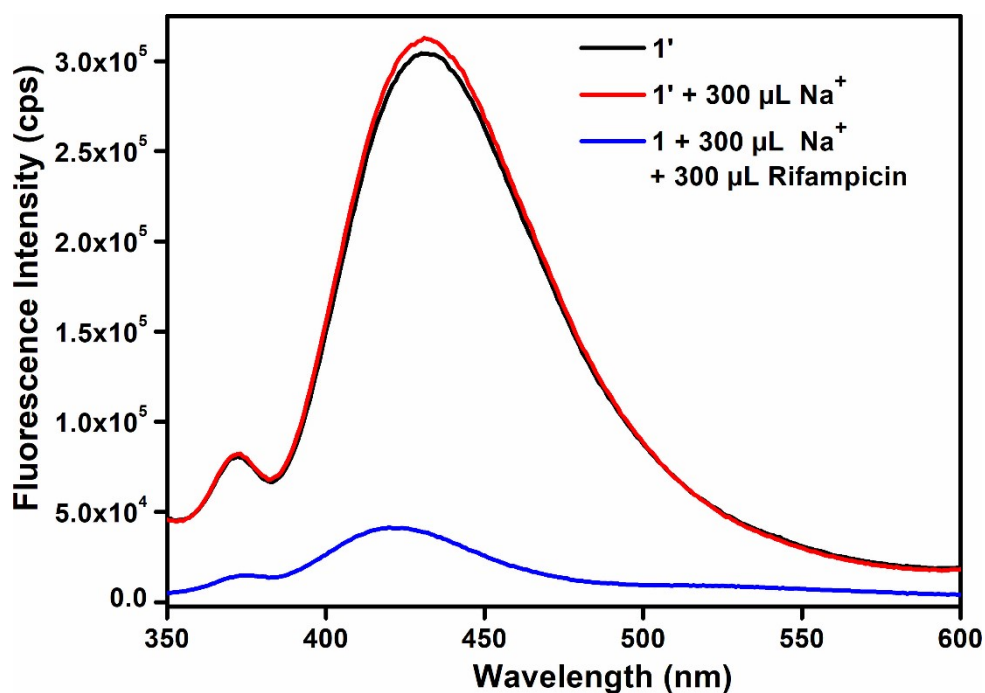

**Figure S15.** Fluorescence emission intensity of **1'** (black), **1'** in the presence of 300 μL of 1 mM aqueous Na<sup>+</sup> solution (red) and **1'** in the presence of both 300 μL of 1 mM aqueous Na<sup>+</sup> and rifampicin solution (blue).

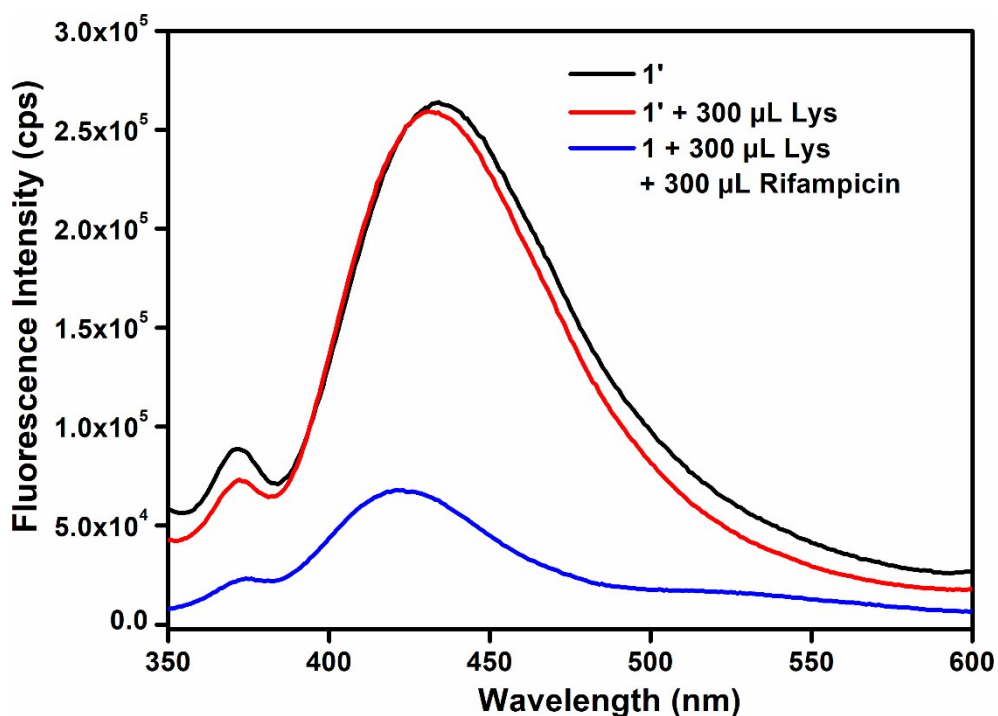

**Figure S16.** Fluorescence emission intensity of **1'** (black), **1'** in the presence of 300 μL of 1 mM aqueous lysine solution (red) and **1'** in the presence of both 300 μL of 1 mM aqueous lysine and rifampicin solution (blue).

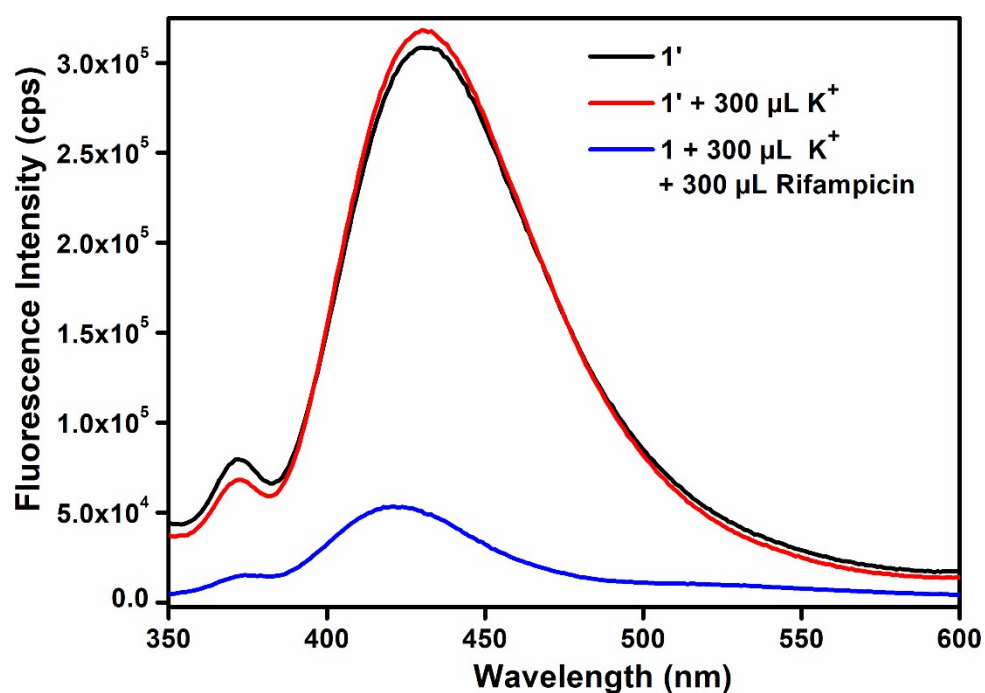

**Figure S17.** Fluorescence emission intensity of **1'** (black), **1'** in the presence of 300 μL of 1 mM aqueous K<sup>+</sup> solution (red) and **1'** in the presence of both 300 μL of 1 mM aqueous K<sup>+</sup> and rifampicin solution (blue).

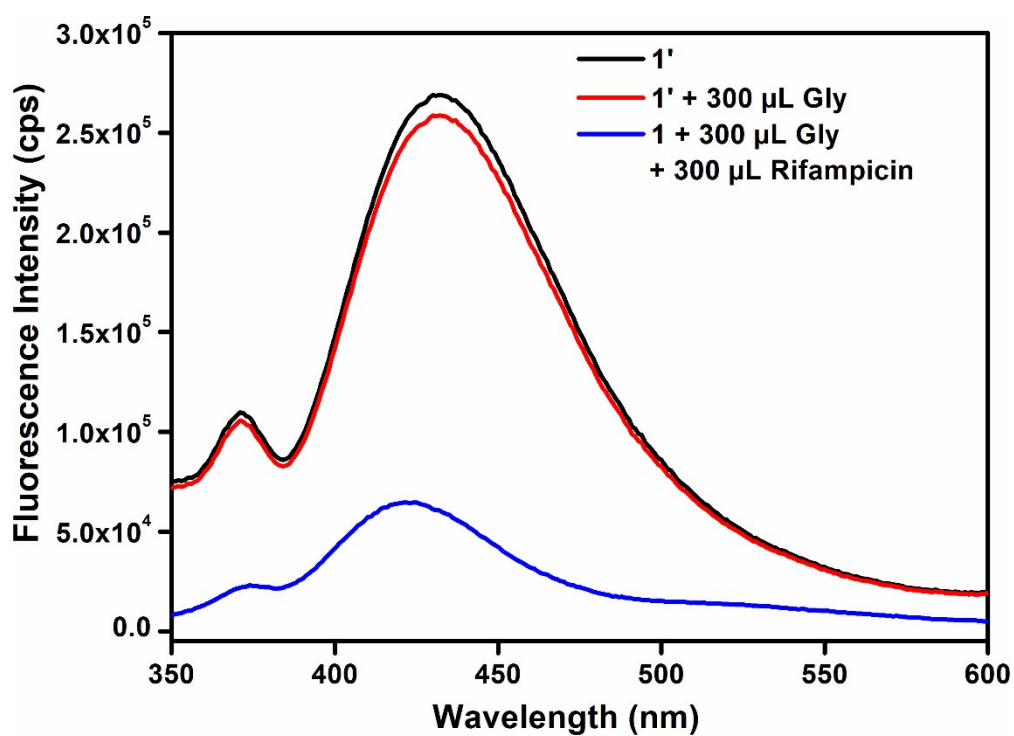

**Figure S18.** Fluorescence emission intensity of **1'** (black), **1'** in the presence of 300 μL of 1 mM aqueous glycine solution (red) and **1'** in the presence of both 300 μL of 1 mM aqueous glycine and rifampicin solution (blue).

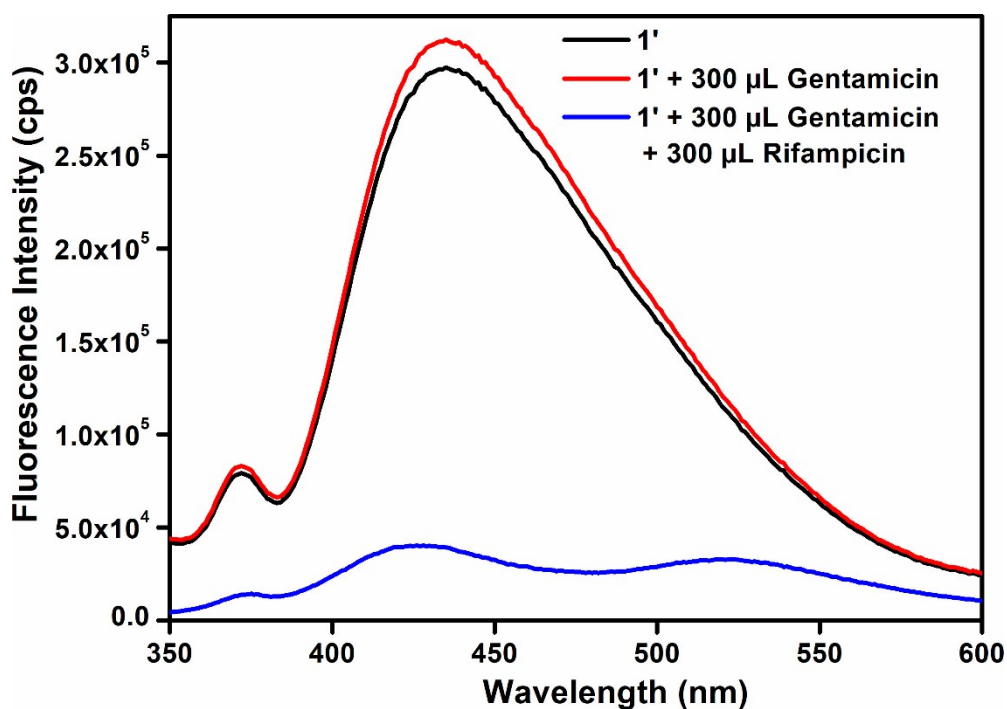

**Figure S19.** Fluorescence emission intensity of **1'** (black), **1'** in the presence of 300  $\mu\text{L}$  of 1 mM aqueous gentamicin solution (red) and **1'** in the presence of both 300  $\mu\text{L}$  of 1 mM aqueous gentamicin and rifampicin solution (blue).

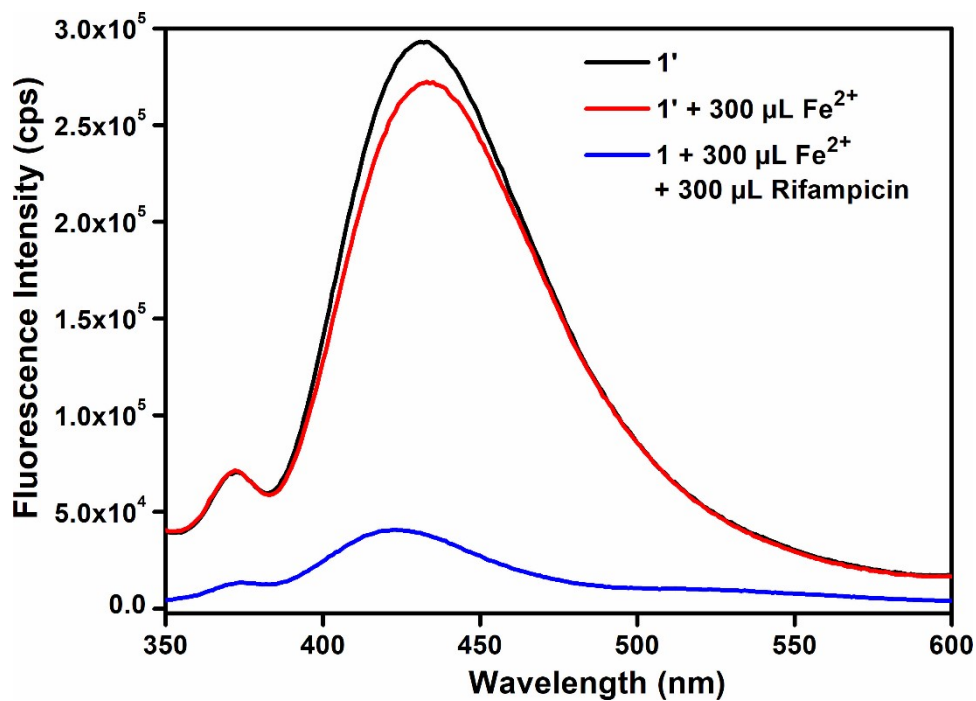

**Figure S20.** Fluorescence emission intensity of **1'** (black), **1'** in the presence of 300  $\mu\text{L}$  of 1 mM aqueous Fe<sup>2+</sup> solution (red) and **1'** in the presence of both 300  $\mu\text{L}$  of 1 mM aqueous Fe<sup>2+</sup> and rifampicin solution (blue).

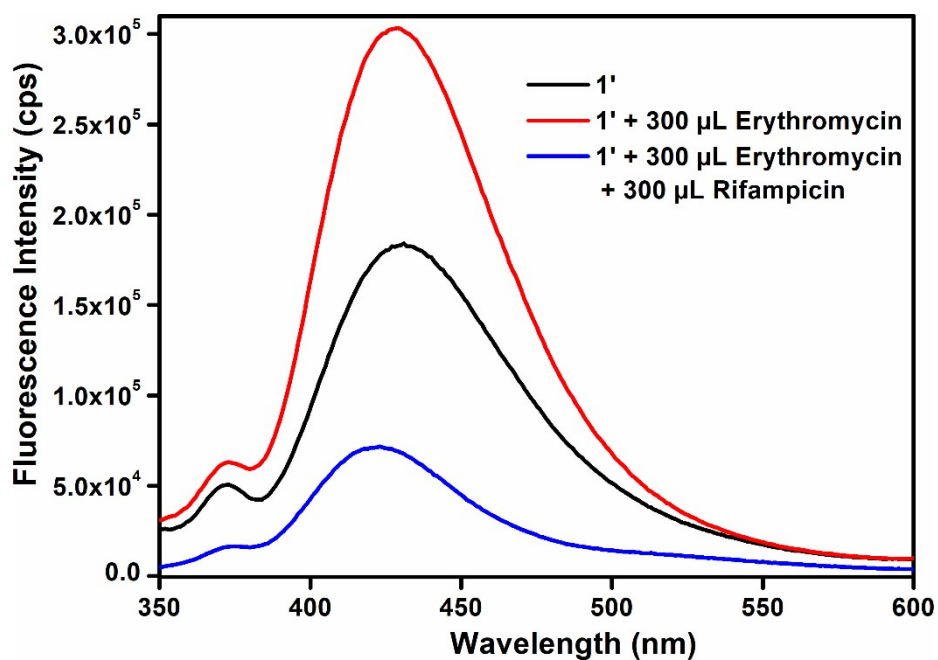

**Figure S21.** Fluorescence emission intensity of **1'** (black), **1'** in the presence of 300  $\mu$ L of 1 mM aqueous erythromycin solution (red) and **1'** in the presence of both 300  $\mu$ L of 1 mM aqueous erythromycin and rifampicin solution (blue).

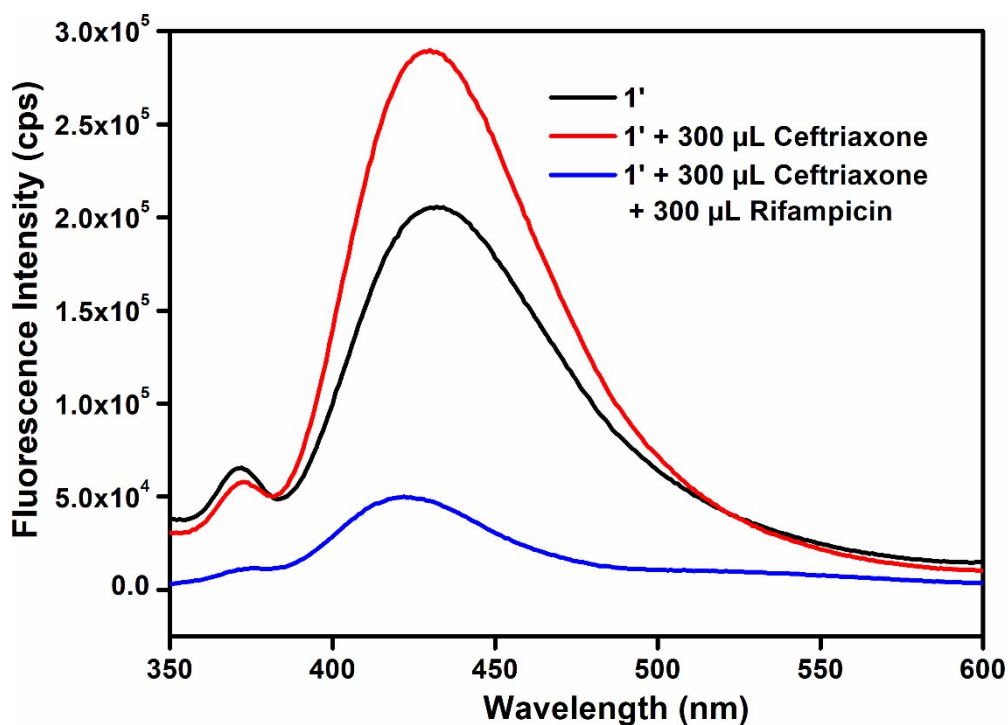

**Figure S22.** Fluorescence emission intensity of **1'** (black), **1'** in the presence of 300  $\mu$ L of 1 mM aqueous ceftriaxone solution (red) and **1'** in the presence of both 300  $\mu$ L of 1 mM aqueous ceftriaxone and rifampicin solution (blue).

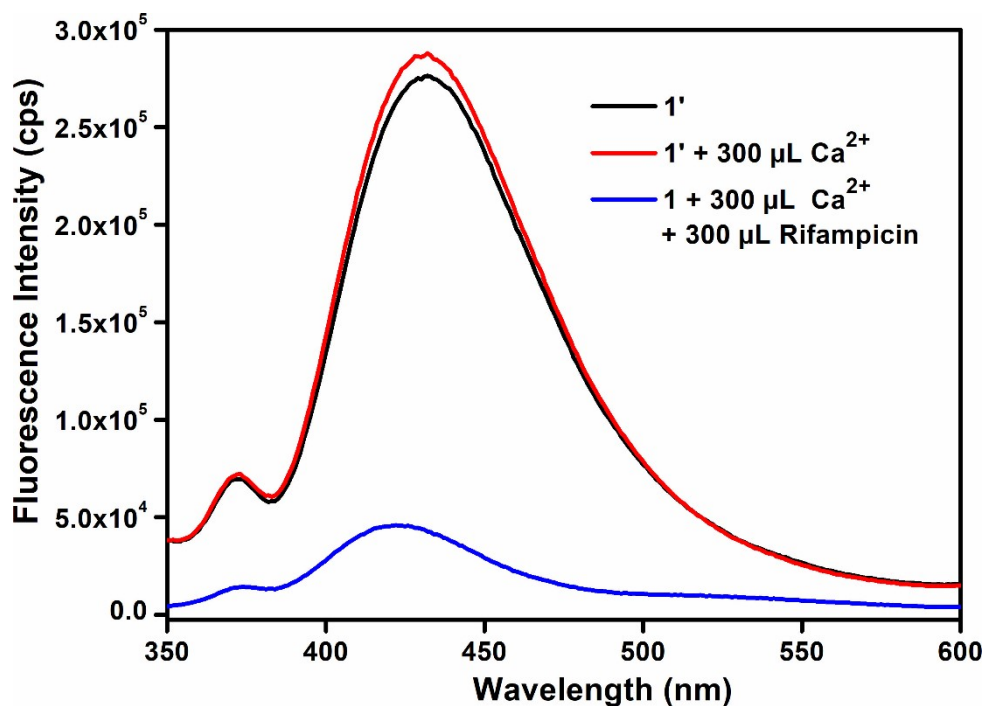

**Figure S23.** Fluorescence emission intensity of **1'** (black), **1'** in the presence of 300 μL of 1 mM aqueous Ca<sup>2+</sup> solution (red) and **1'** in the presence of both 300 μL of 1 mM aqueous Ca<sup>2+</sup> and rifampicin solution (blue).

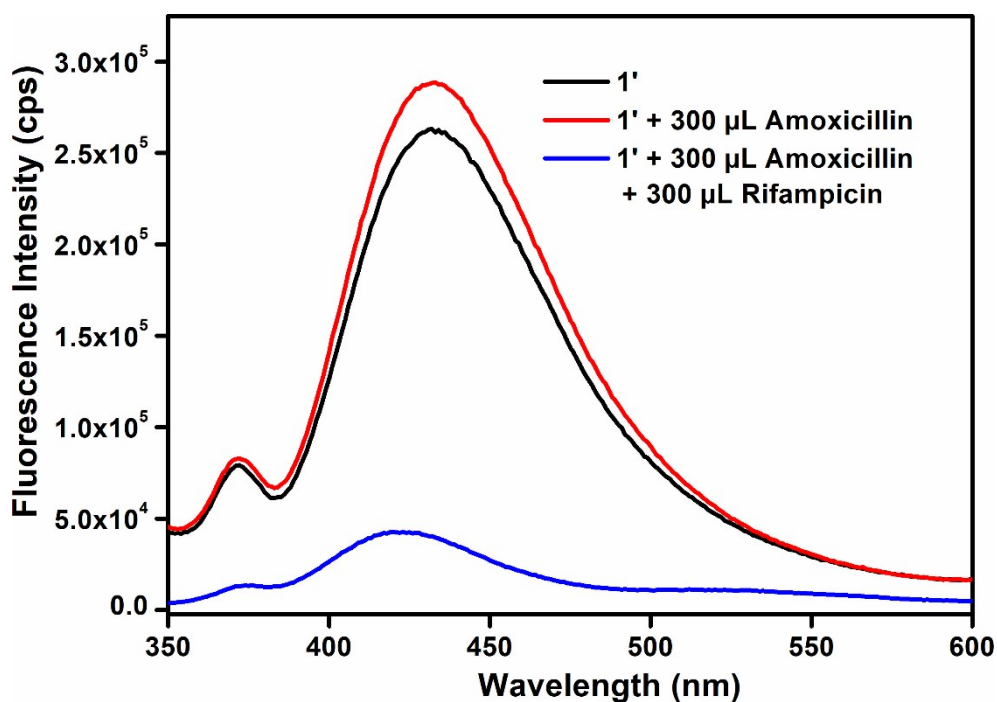

**Figure S24.** Fluorescence emission intensity of **1'** (black), **1'** in the presence of 300 μL of 1 mM aqueous amoxicillin solution (red) and **1'** in the presence of both 300 μL of 1 mM aqueous amoxicillin and rifampicin solution (blue).

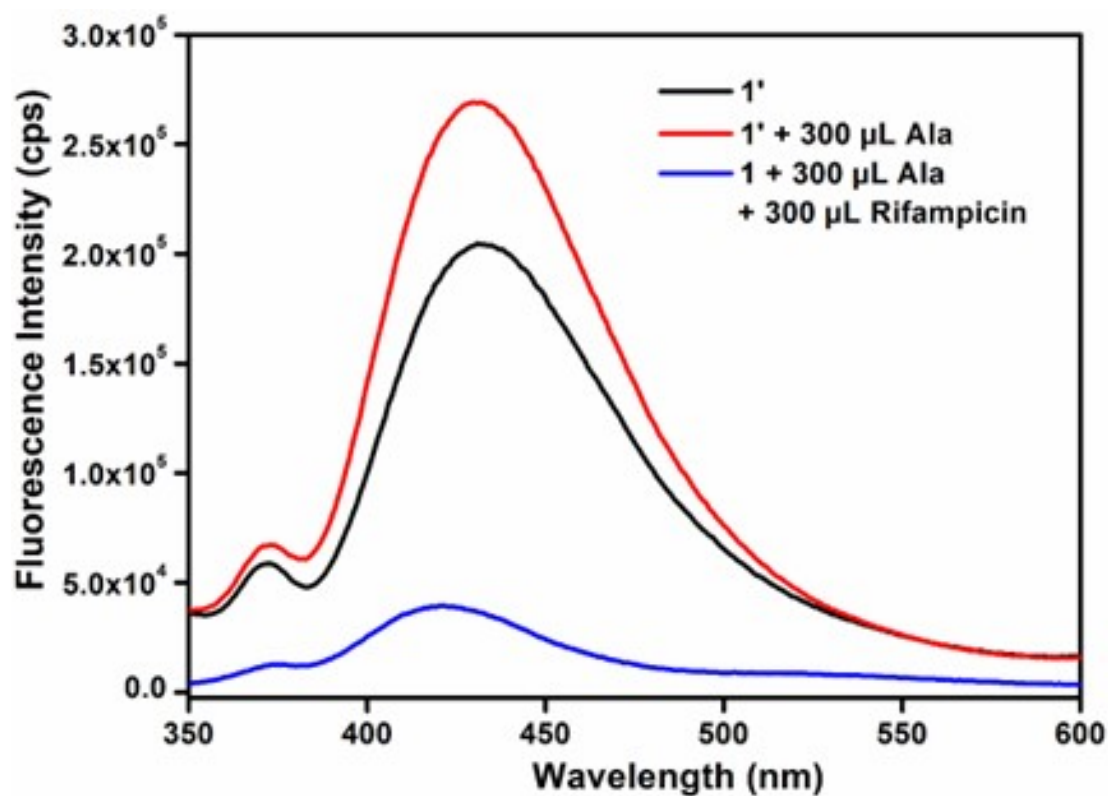

**Figure S25.** Fluorescence emission intensity of **1'** (black), **1'** in the presence of 300 μL of 1 mM aqueous alanine solution (red) and **1'** in the presence of both 300 μL of 1 mM aqueous alanine and rifampicin solution (blue).

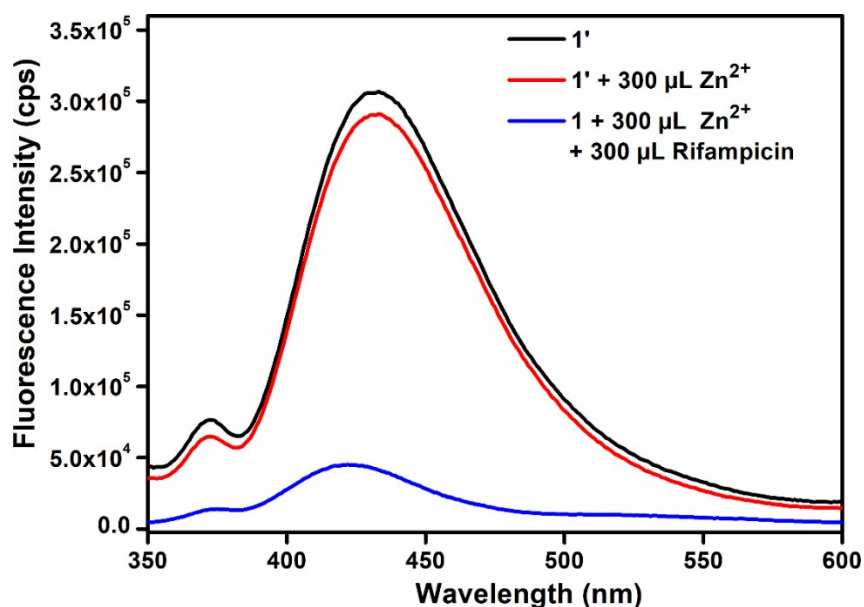

**Figure S26.** Fluorescence emission intensity of **1'** (black), **1'** in the presence of 300 μL of 1 mM aqueous Zn<sup>2+</sup> solution (red) and **1'** in the presence of both 300 μL of 1 mM aqueous Zn<sup>2+</sup> and rifampicin solution (blue).

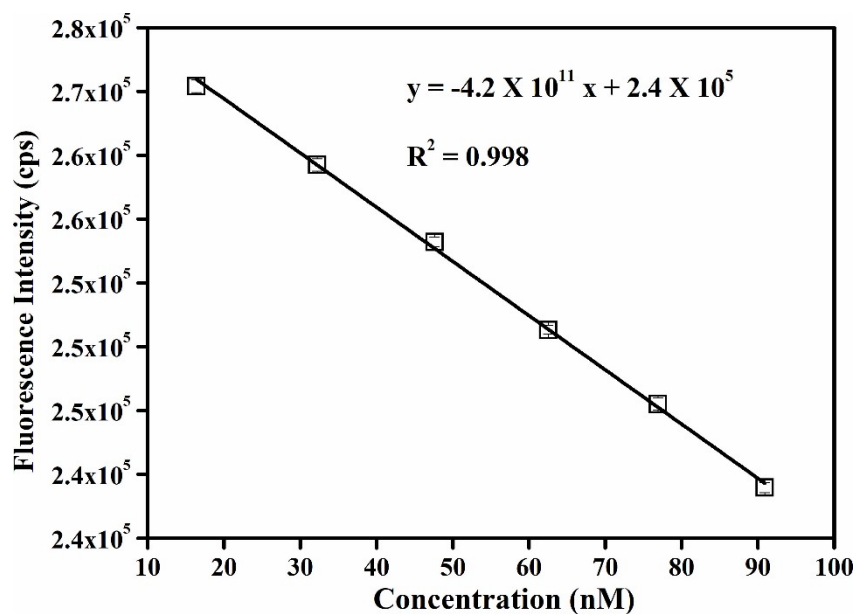

Figure S27. Plot of concentration of rifampicin versus fluorescence intensity of 1'.

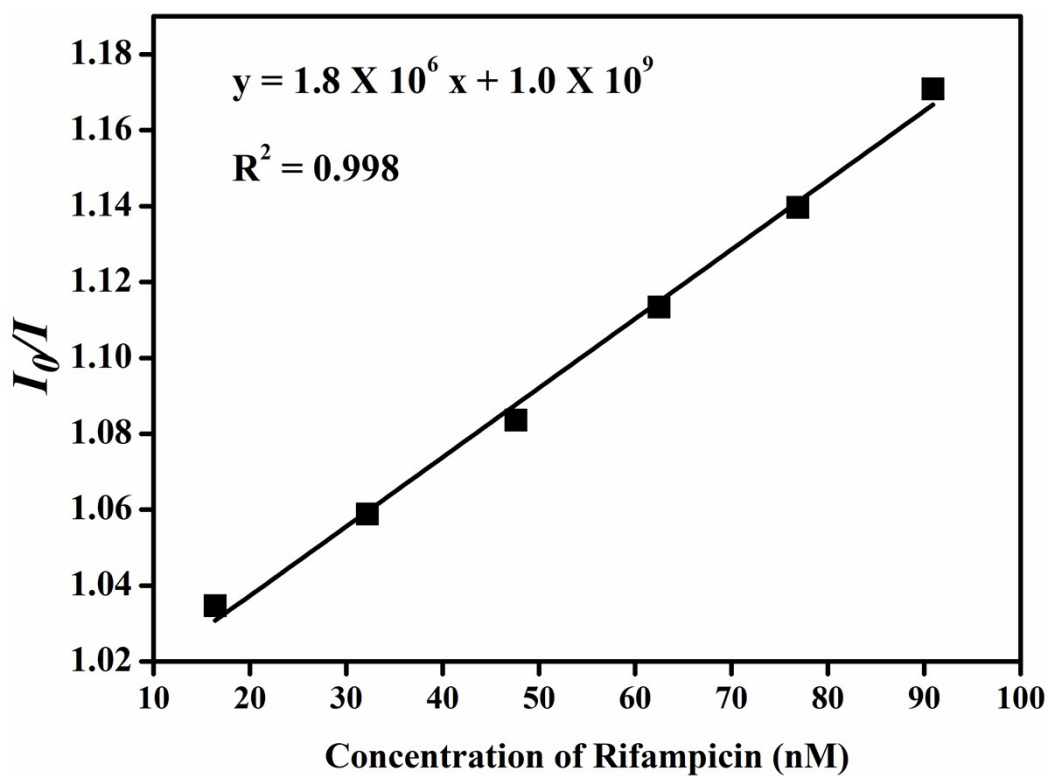

Figure S28. Stern-Volmer plot for 1' with the incremental addition of rifampicin solution.



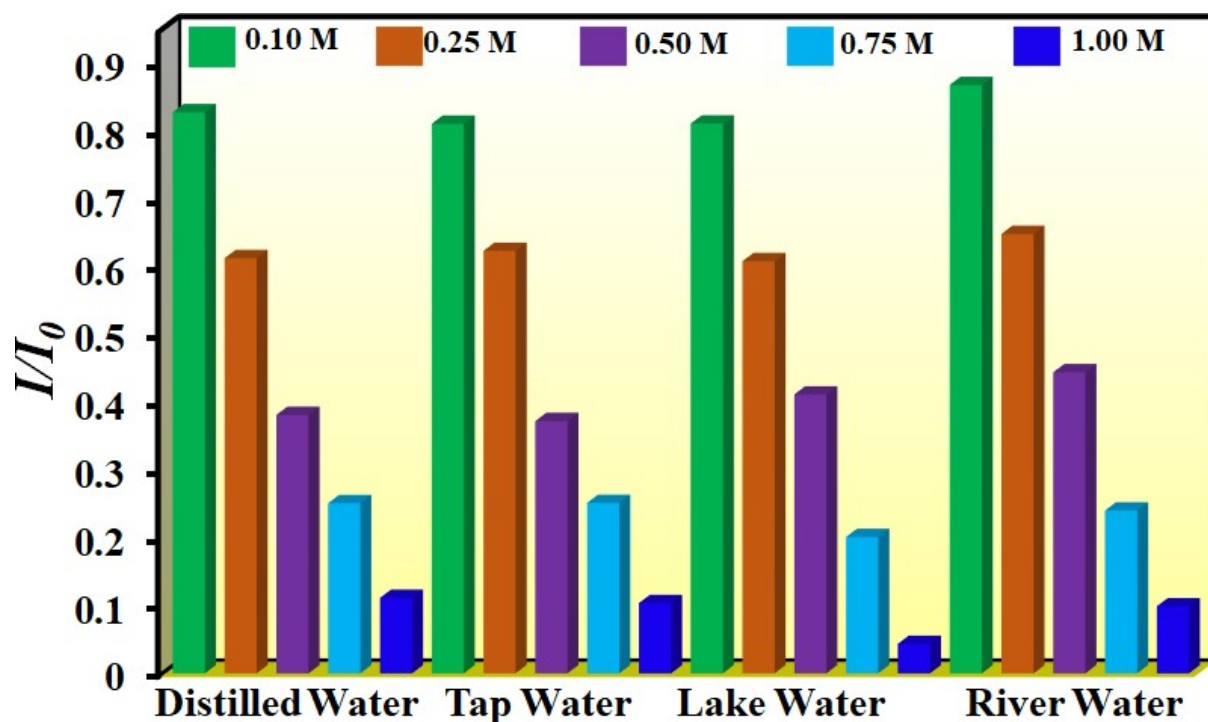

Figure S29. Bar plot depicting the detection of rifampicin from real water specimens by 1'.

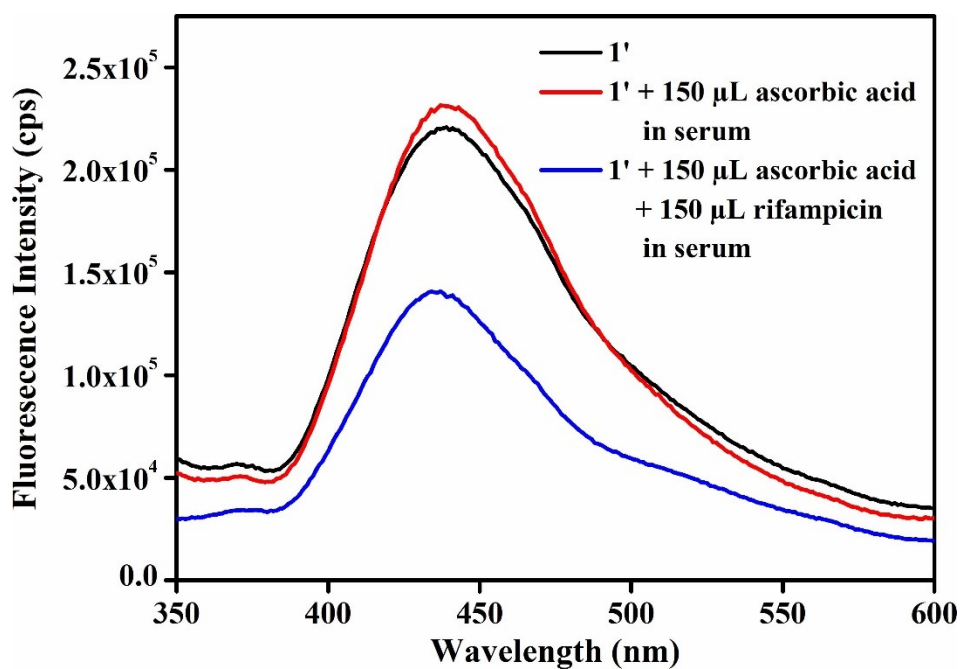

Figure S30. Fluorescence intensity of 1' in human blood serum in presence of only ascorbic acid (red) and mixture of ascorbic acid and rifampicin (blue).

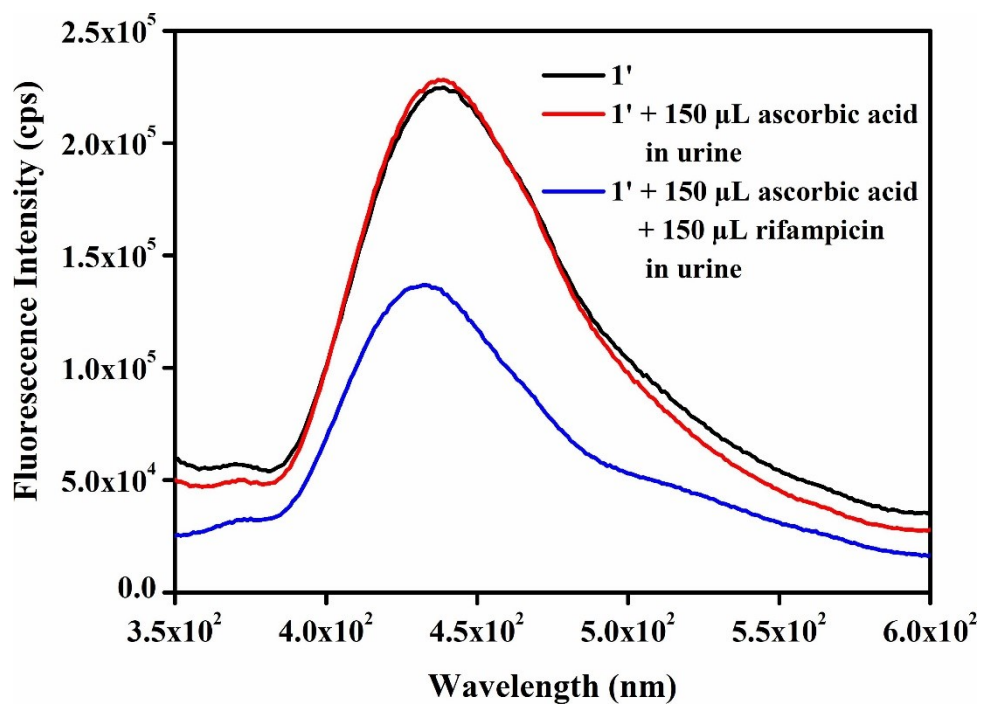

**Figure S31.** Fluorescence sensing of **1'** in human urine in presence of only ascorbic acid (red) and mixture of ascorbic acid and rifampicin (blue).

**Table S2.** Detection of rifampicin from human blood serum using **1'**.

| Rifampicin Spiked (mol L <sup>-1</sup> ) | Rifampicin Found (mol L <sup>-1</sup> )* | Recovery (%) | RSD (%) (n=3) |
|------------------------------------------|------------------------------------------|--------------|---------------|
| 9.804×10 <sup>-6</sup>                   | 9.541×10 <sup>-6</sup>                   | 97.3         | 2.21          |
| 2.206×10 <sup>-5</sup>                   | 2.322×10 <sup>-5</sup>                   | 105.3        | 2.54          |
| 3.271×10 <sup>-5</sup>                   | 3.222×10 <sup>-5</sup>                   | 98.5         | 1.75          |

**Table S3.** Detection of rifampicin from human urine using **1'**.

| Rifampicin Spiked (mol L <sup>-1</sup> ) | Rifampicin Found (mol L <sup>-1</sup> )* | Recovery (%) | RSD (%) (n=3) |
|------------------------------------------|------------------------------------------|--------------|---------------|
| 9.804×10 <sup>-6</sup>                   | 9.311×10 <sup>-6</sup>                   | 94.9         | 3.98          |
| 2.206×10 <sup>-5</sup>                   | 2.361×10 <sup>-5</sup>                   | 107.0        | 2.79          |
| 3.271×10 <sup>-5</sup>                   | 3.073×10 <sup>-5</sup>                   | 93.9         | 3.39          |

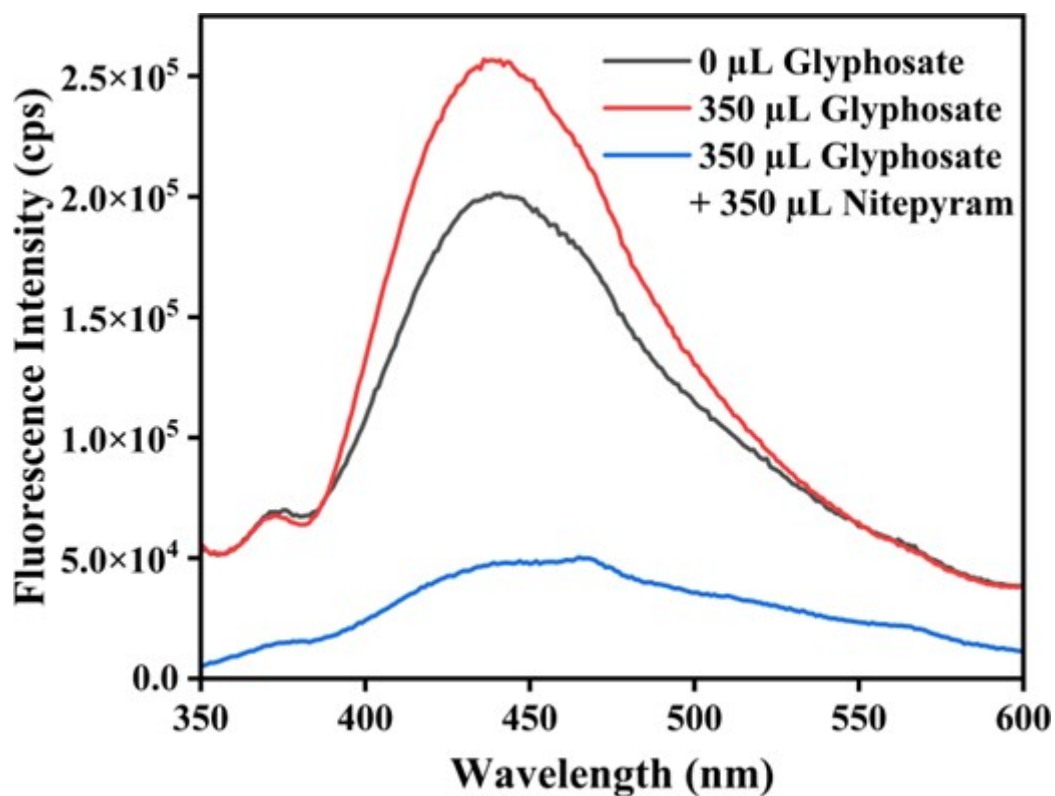

**Figure S32.** Fluorescence emission intensity of **1'** (black), **1'** in the presence of 300  $\mu\text{L}$  of 5 mM aqueous glyphosate solution (red) and **1'** in the presence of both 300  $\mu\text{L}$  of 5 mM aqueous glyphosate and rifampicin solution (blue).

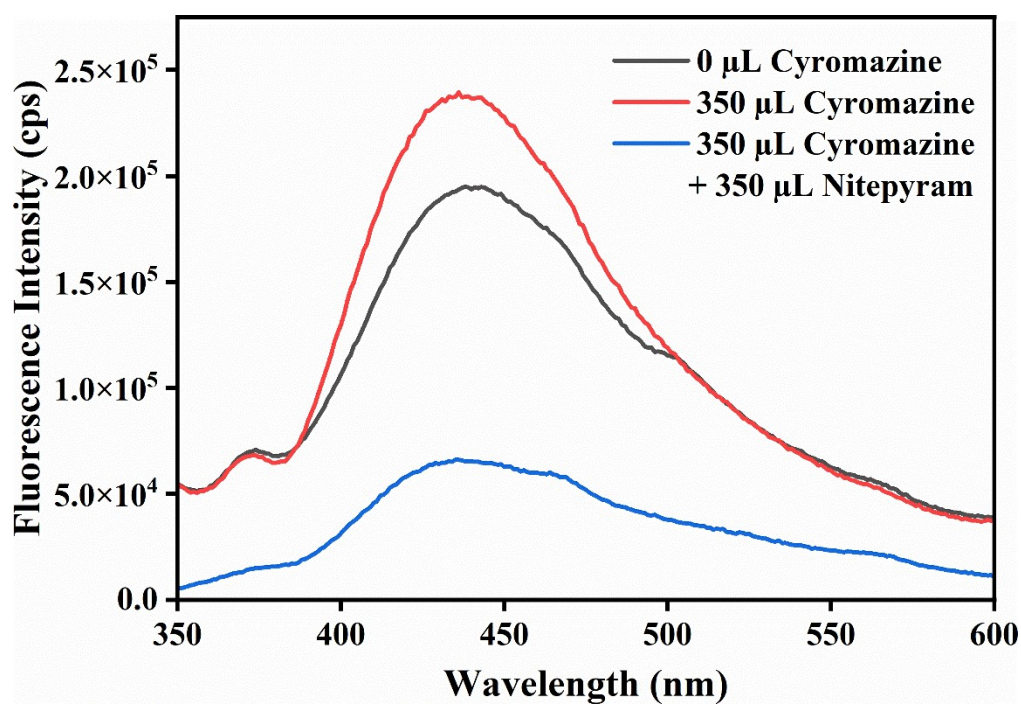

**Figure S33.** Fluorescence emission intensity of **1'** (black), **1'** in the presence of 300  $\mu\text{L}$  of 5 mM aqueous cyromazine solution (red) and **1'** in the presence of both 300  $\mu\text{L}$  of 5 mM aqueous cyromazine and rifampicin solution (blue).

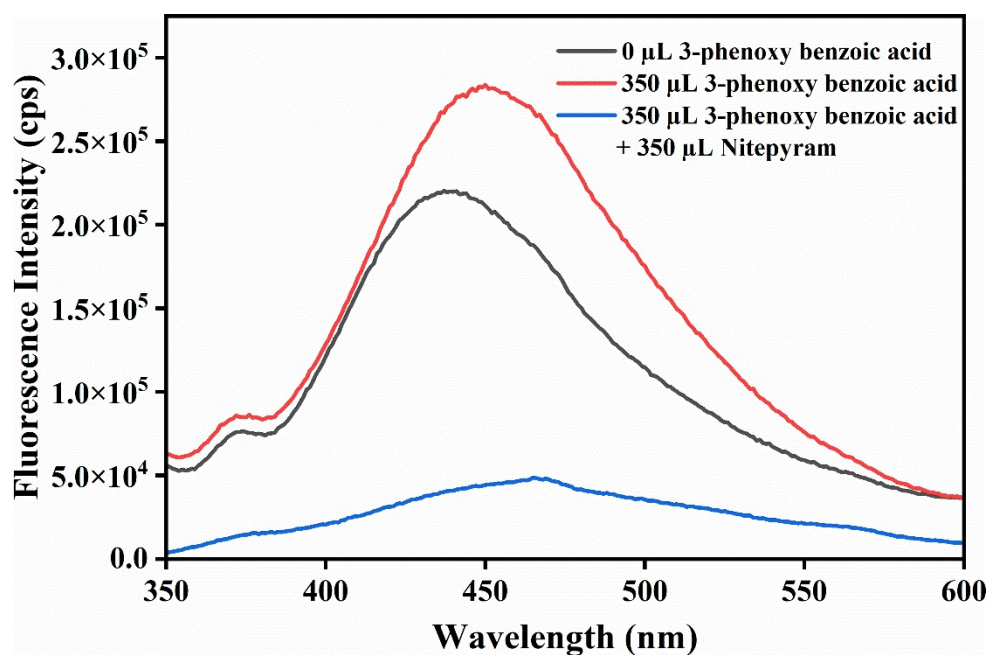

**Figure S34.** Fluorescence emission intensity of **1'** (black), **1'** in the presence of 300  $\mu$ L of 5 mM aqueous 3-phenoxy benzoic acid solution (red) and **1'** in the presence of both 300  $\mu$ L of 5 mM aqueous 3-phenoxy benzoic acid and rifampicin solution (blue).

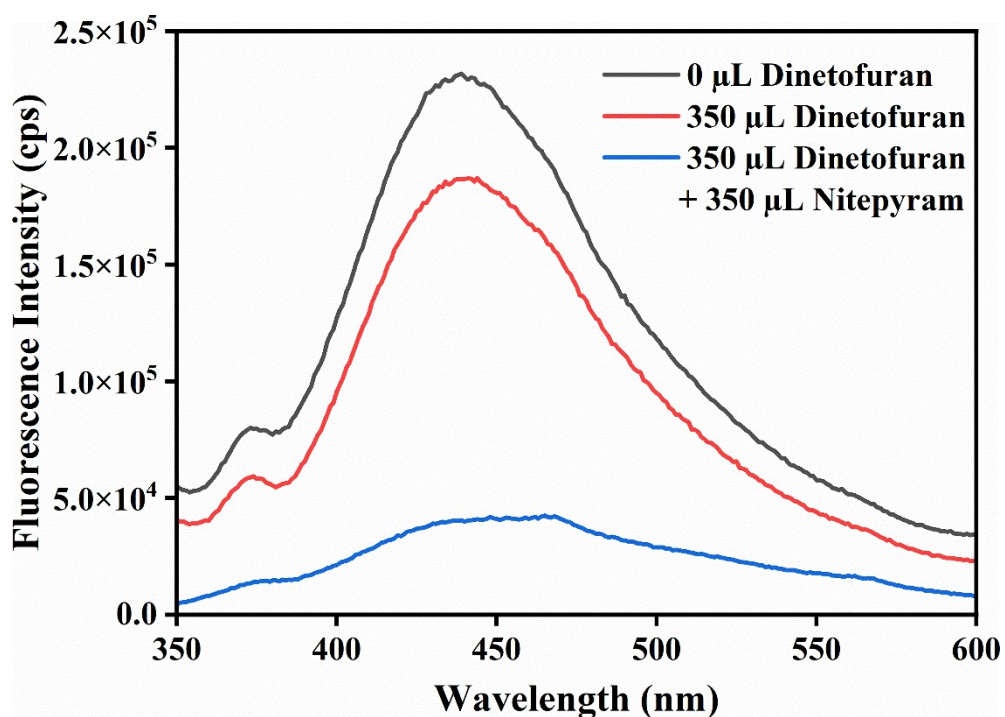

**Figure S35.** Fluorescence emission intensity of **1'** (black), **1'** in the presence of 300  $\mu$ L of 5 mM aqueous dinetofuran solution (red) and **1'** in the presence of both 300  $\mu$ L of 5 mM aqueous dinetofuran and rifampicin solution (blue).

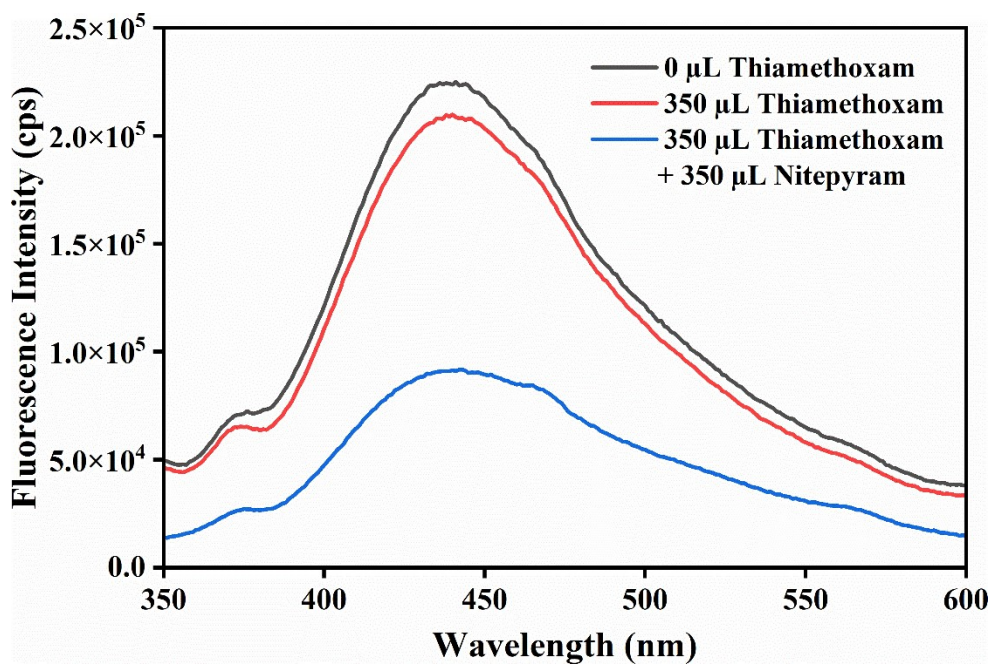

**Figure S36.** Fluorescence emission intensity of **1'** (black), **1'** in the presence of 300 μL of 1 mM aqueous thiamethoxam solution (red) and **1'** in the presence of both 300 μL of 1 mM aqueous thiamethoxam and rifampicin solution (blue).

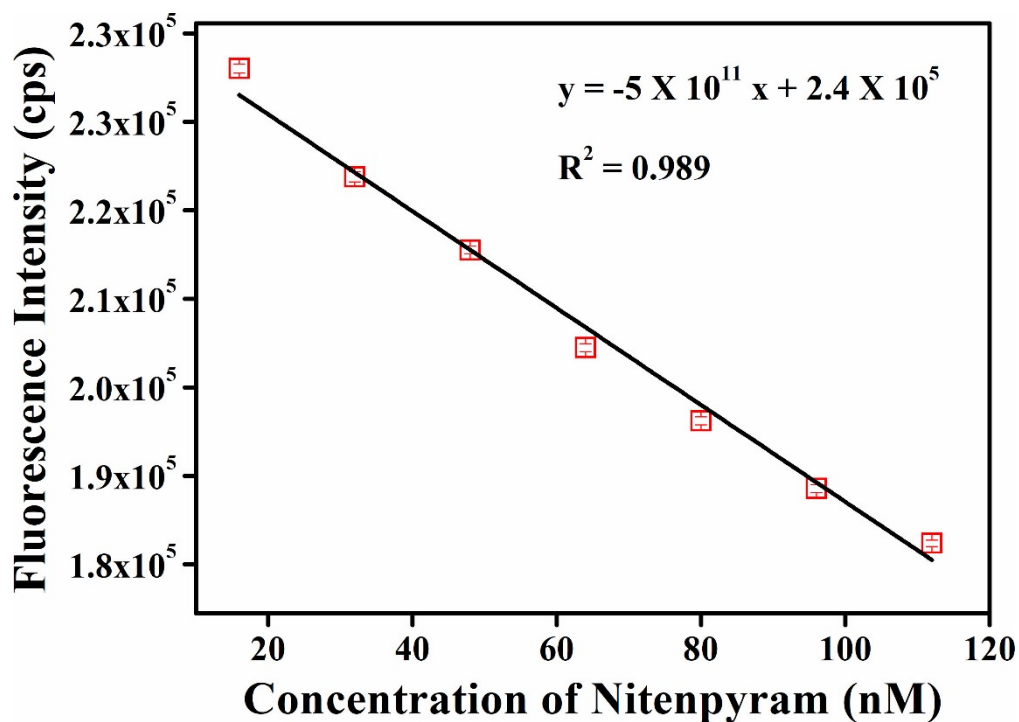

**Figure S37.** Plot of concentration of nitenpyram versus fluorescence intensity of **1'**.

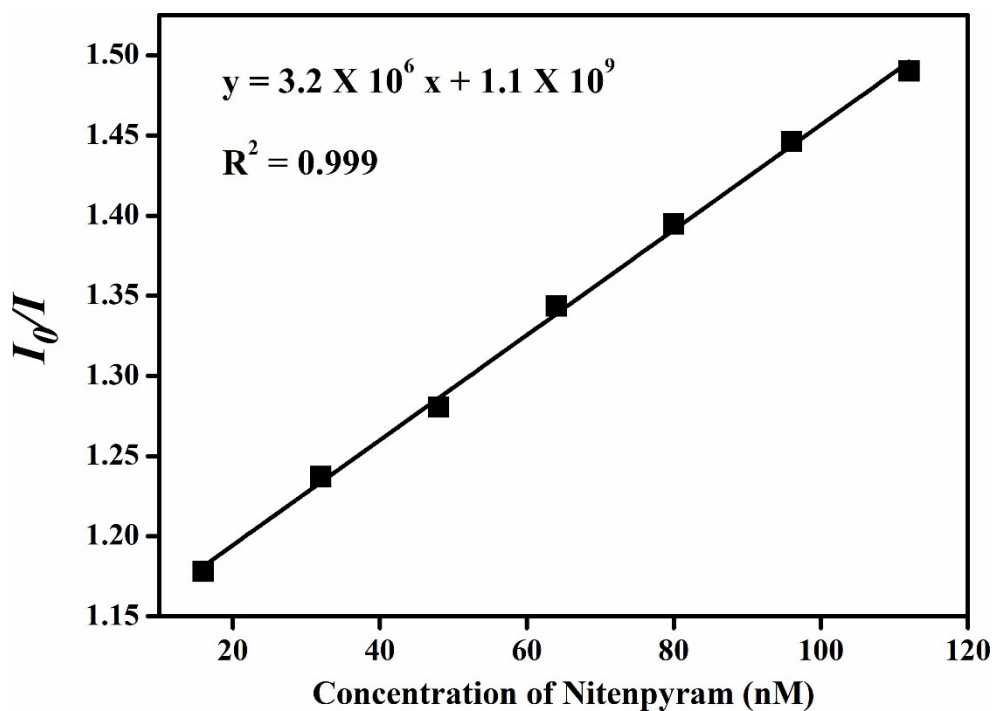

**Figure S38.** Stern-Volmer plot for **1'** with the incremental addition of nitenpyram solution.

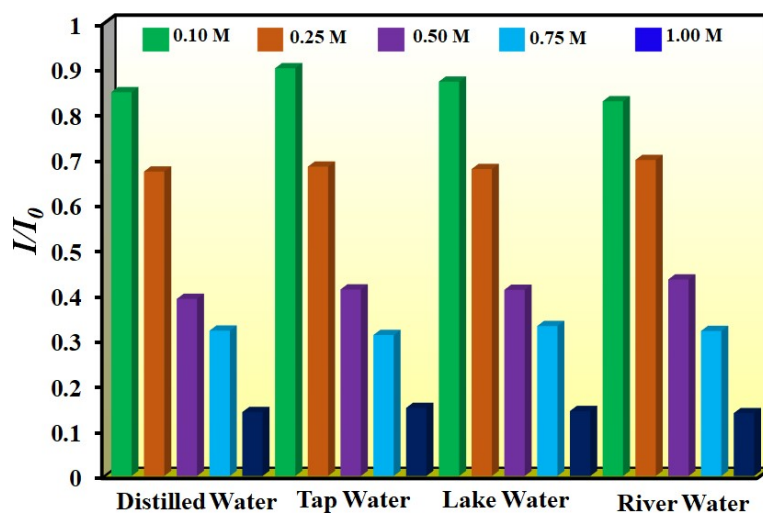

**Figure S39.** Bar plot depicting the detection of nitenpyram from real-water specimens by **1'**.

**Table S4.** Detection of nitenpyram from soil using **1'**.

| Nitenpyram Spiked (mol L <sup>-1</sup> ) | Nitenpyram Found (mol L <sup>-1</sup> )* | Recovery (%) | RSD (%) (n=3) |
|------------------------------------------|------------------------------------------|--------------|---------------|
| $3.922 \times 10^{-5}$                   | $3.891 \times 10^{-5}$                   | 99.2         | 3.94          |
| $8.612 \times 10^{-5}$                   | $8.873 \times 10^{-5}$                   | 103.0        | 2.18          |
| $1.308 \times 10^{-4}$                   | $1.278 \times 10^{-4}$                   | 97.7         | 3.17          |

**Table S5.** Detection of nitenpyram from rice using **1'**.

| Nitenpyram Spiked (mol L <sup>-1</sup> ) | Nitenpyram Found (mol L <sup>-1</sup> )* | Recovery (%) | RSD (%) (n=3) |
|------------------------------------------|------------------------------------------|--------------|---------------|
| 3.922×10 <sup>-5</sup>                   | 4.103×10 <sup>-5</sup>                   | 104.6        | 2.98          |
| 8.612×10 <sup>-5</sup>                   | 8.838×10 <sup>-5</sup>                   | 102.6        | 3.07          |
| 1.308×10 <sup>-4</sup>                   | 1.295×10 <sup>-4</sup>                   | 99.0         | 1.98          |

**Table S6.** Detection of nitenpyram from corn using **1'**.

| Nitenpyram Spiked (mol L <sup>-1</sup> ) | Nitenpyram Found (mol L <sup>-1</sup> )* | Recovery (%) | RSD (%) (n=3) |
|------------------------------------------|------------------------------------------|--------------|---------------|
| 3.922×10 <sup>-5</sup>                   | 4.137×10 <sup>-5</sup>                   | 105.5        | 3.43          |
| 8.612×10 <sup>-5</sup>                   | 8.986×10 <sup>-5</sup>                   | 104.3        | 2.74          |
| 1.308×10 <sup>-4</sup>                   | 1.292×10 <sup>-4</sup>                   | 98.8         | 3.19          |

**Table S7.** Evaluation of intra-day, inter-day accuracy and precision parameters for change in fluorescence intensity of **1'** after incremental addition of 1 mM aqueous solution of rifampicin respectively.

| Volume of Rifampicin Added | Intra-Day Fluorescence Emission Intensity (cps) |          |          | Mean (χ) | Standard Deviation (σ) | Relative Standard Deviation (RSD) |
|----------------------------|-------------------------------------------------|----------|----------|----------|------------------------|-----------------------------------|
|                            |                                                 |          |          |          |                        |                                   |
| 0 μL                       | 254237                                          | 254252.2 | 253221.7 | 253903.6 | 482.2357               | 0.189                             |
| 50 μL                      | 175498.7                                        | 174478.8 | 174518.7 | 174832.1 | 471.6866               | 0.269                             |
| 100 μL                     | 118513.9                                        | 117911.6 | 117516.2 | 117980.6 | 410.2253               | 0.347                             |
| 150 μL                     | 94002.16                                        | 92999.91 | 93421.4  | 93474.4  | 410.8826               | 0.439                             |
| 200 μL                     | 58046.29                                        | 57995.36 | 59007.22 | 58349.6  | 465.4527               | 0.797                             |
| 250 μL                     | 34017.82                                        | 32945.46 | 33290.2  | 33417.8  | 446.9949               | 1.337                             |
| 300 μL                     | 19585.53                                        | 19193.82 | 19977.2  | 19585.5  | 319.8304               | 1.632                             |
| Volume of Rifampicin Added | Inter-Day Fluorescence Emission Intensity (cps) |          |          | Mean (χ) | Standard Deviation (σ) | Relative Standard Deviation (RSD) |
|                            |                                                 |          |          |          |                        |                                   |
| 0 μL                       | 258754.5                                        | 258237   | 260565.8 | 258519.1 | 860.1                  | 0.333                             |
| 50 μL                      | 176351.4                                        | 175998.7 | 177585.9 | 176478.7 | 554.6                  | 0.314                             |
| 100 μL                     | 120955.8                                        | 120713.9 | 121802.5 | 120624.1 | 448.4                  | 0.372                             |
| 150 μL                     | 94451.1                                         | 94262.2  | 95112.2  | 94641.81 | 409.8                  | 0.433                             |
| 200 μL                     | 58062.4                                         | 57946.3  | 58468.8  | 58492.52 | 415.7                  | 0.711                             |
| 250 μL                     | 33685.2                                         | 33617.8  | 33920.9  | 33674.66 | 385.3                  | 1.144                             |
| 300 μL                     | 19624.8                                         | 19585.5  | 19762.2  | 19390.83 | 238.5                  | 1.230                             |

**Table S8.** Evaluation of intra-day, inter-day accuracy and precision parameters for change in fluorescence intensity of **1'** after incremental addition of 5 mM aqueous solution of nitenpyram.

| Volume of Nitenpyram Added | Intra-Day Fluorescence Emission Intensity (cps) |          |          | Mean ( $\chi$ ) | Standard Deviation ( $\sigma$ ) | Relative Standard Deviation (RSD) |
|----------------------------|-------------------------------------------------|----------|----------|-----------------|---------------------------------|-----------------------------------|
|                            |                                                 |          |          |                 |                                 |                                   |
| 0 $\mu$ L                  | 250900                                          | 251952   | 251548   | 251466.5        | 433.2                           | 0.172                             |
| 50 $\mu$ L                 | 186805                                          | 187120   | 187689   | 187204.9        | 365.8                           | 0.195                             |
| 100 $\mu$ L                | 144381                                          | 143941   | 143317   | 143879.8        | 436.2                           | 0.303                             |
| 150 $\mu$ L                | 104934                                          | 105012   | 105918   | 105287.8        | 446.6                           | 0.424                             |
| 200 $\mu$ L                | 69925.6                                         | 69025.3  | 68896.6  | 69282.5         | 457.8                           | 0.660                             |
| 250 $\mu$ L                | 43523.8                                         | 42912.1  | 42558.3  | 42998.1         | 398.8                           | 0.927                             |
| 300 $\mu$ L                | 21536.6                                         | 20914.3  | 21817.5  | 21422.8         | 377.4                           | 1.762                             |
| Volume of Nitenpyram Added | Inter-Day Fluorescence Emission Intensity (cps) |          |          | Mean ( $\chi$ ) | Standard Deviation ( $\sigma$ ) | Relative Standard Deviation (RSD) |
|                            |                                                 |          |          |                 |                                 |                                   |
| 0 $\mu$ L                  | 250900                                          | 252859.5 | 251296.4 | 251685.3        | 845.9                           | 0.336                             |
| 50 $\mu$ L                 | 186805                                          | 187868.9 | 187501.5 | 187391.9        | 441.1133                        | 0.235                             |
| 100 $\mu$ L                | 144381                                          | 144517.2 | 143174.1 | 144023.9        | 603.5273                        | 0.419                             |
| 150 $\mu$ L                | 104734                                          | 105811.8 | 105432.1 | 105325.8        | 446.5384                        | 0.423                             |
| 200 $\mu$ L                | 69925.6                                         | 69301.4  | 68727.7  | 69318.23        | 489.1841                        | 0.705                             |
| 250 $\mu$ L                | 43523.8                                         | 42515.74 | 43183.75 | 43074.43        | 418.7348                        | 0.972                             |
| 300 $\mu$ L                | 21536.6                                         | 21715.68 | 20907.96 | 21386.75        | 346.3592                        | 1.619                             |

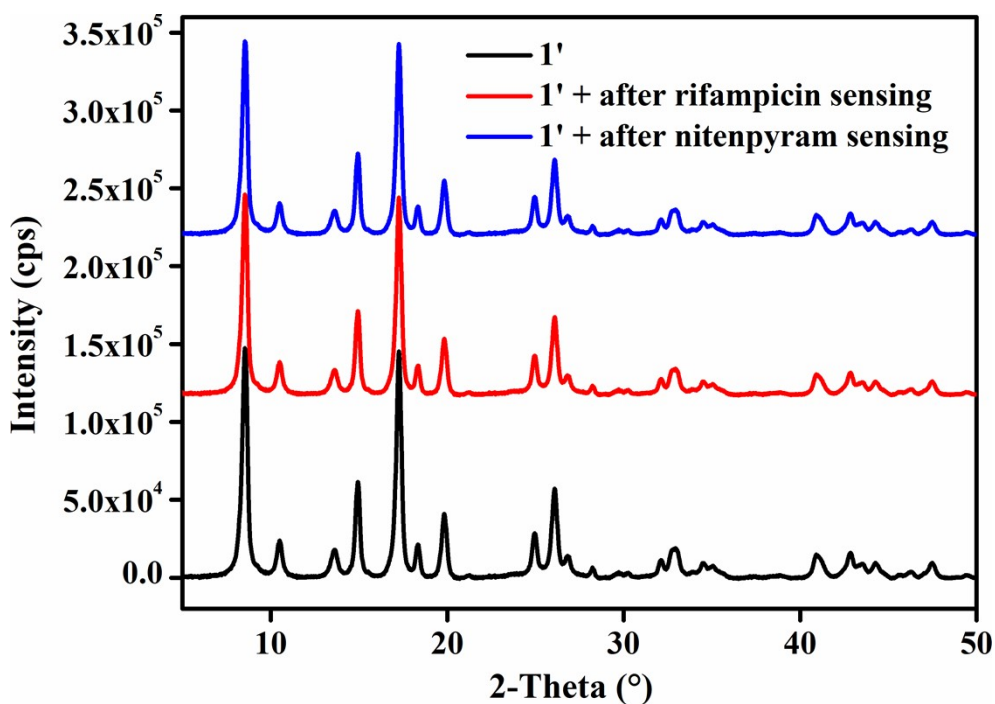

**Figure S40.** PXRD patterns of **1'** before sensing (black), after rifampicin sensing (red) and after nitenpyram sensing (blue).



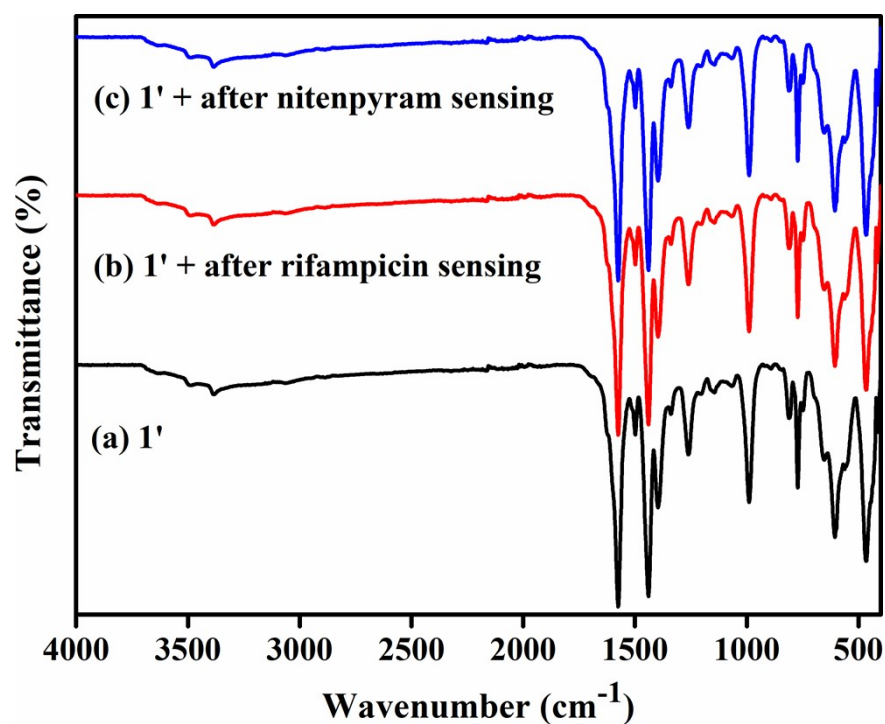

**Figure S41.** ATR-IR spectra of **1'** before sensing (black), after rifampicin sensing (red) and after nitenpyram sensing (blue).

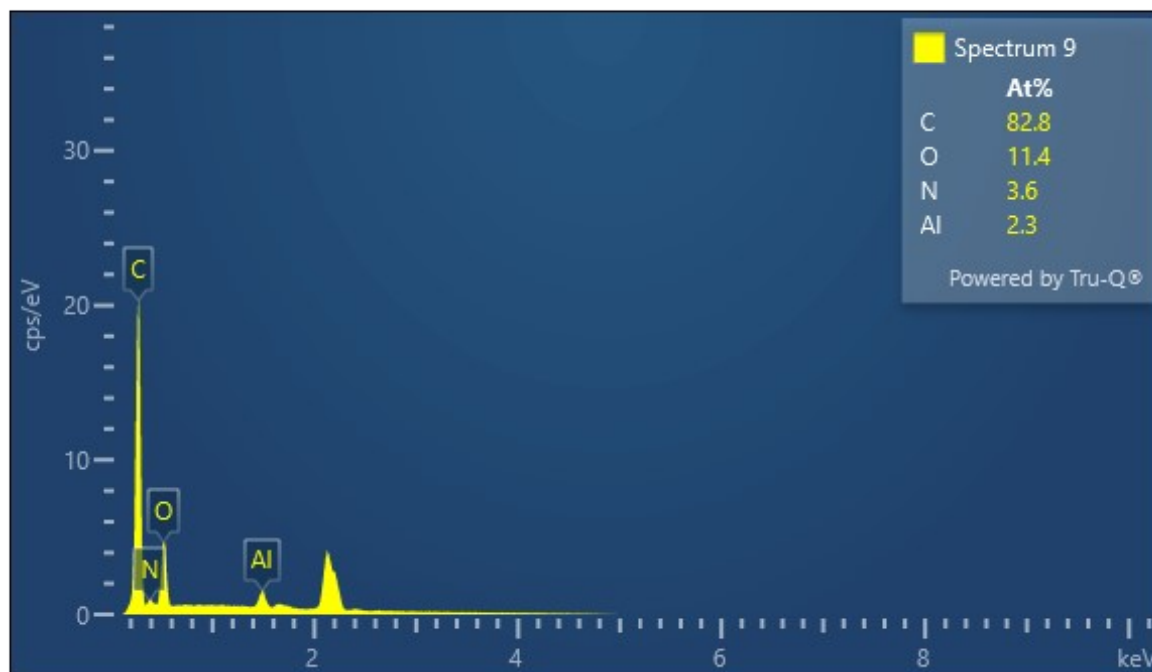

**Figure S42.** EDX elemental spectrum of **1'** after rifampicin sensing.

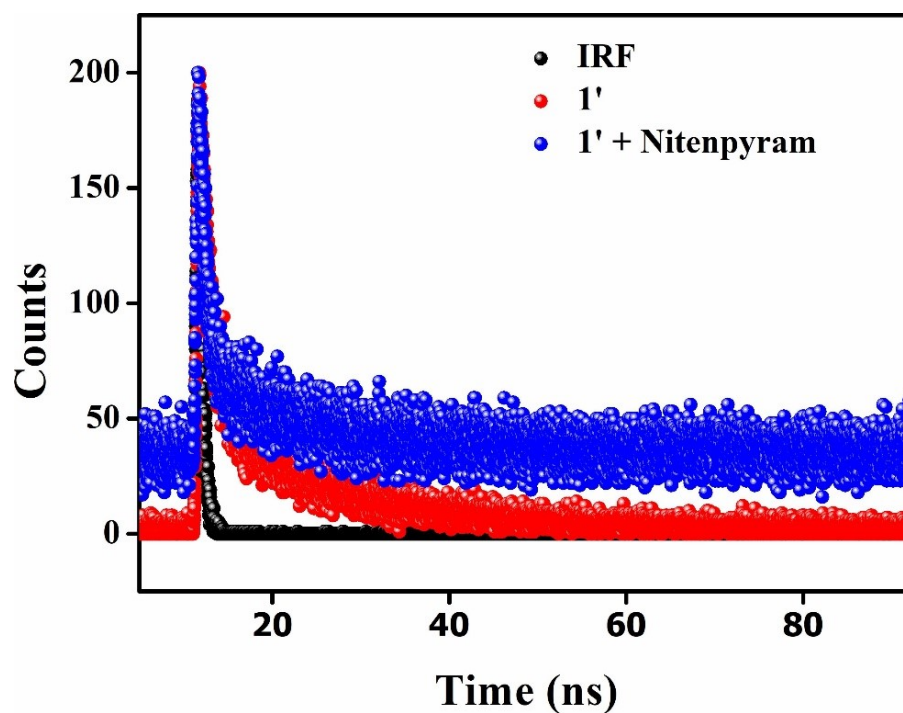

**Figure S43.** Time-resolved fluorescence lifetime decay plot for **1'** in presence and absence of rifampicin.

**Table S9.** Excited-state lifetime of **1'** in presence and absence of rifampicin.

| Volume of Rifampicin Solution Added ( $\mu\text{L}$ ) | $B_1$ (%) | $B_2$ (%) | $T_1$ (ns) | $T_2$ (ns) | $\langle\tau\rangle^*$ (ns) | $\chi^2$ |
|-------------------------------------------------------|-----------|-----------|------------|------------|-----------------------------|----------|
| 0                                                     | 11.5      | 88.5      | 1.3        | 13.2       | 11.8                        | 1.19     |
| 350                                                   | 22.5      | 77.5      | 0.9        | 10.1       | 8.0                         | 1.10     |

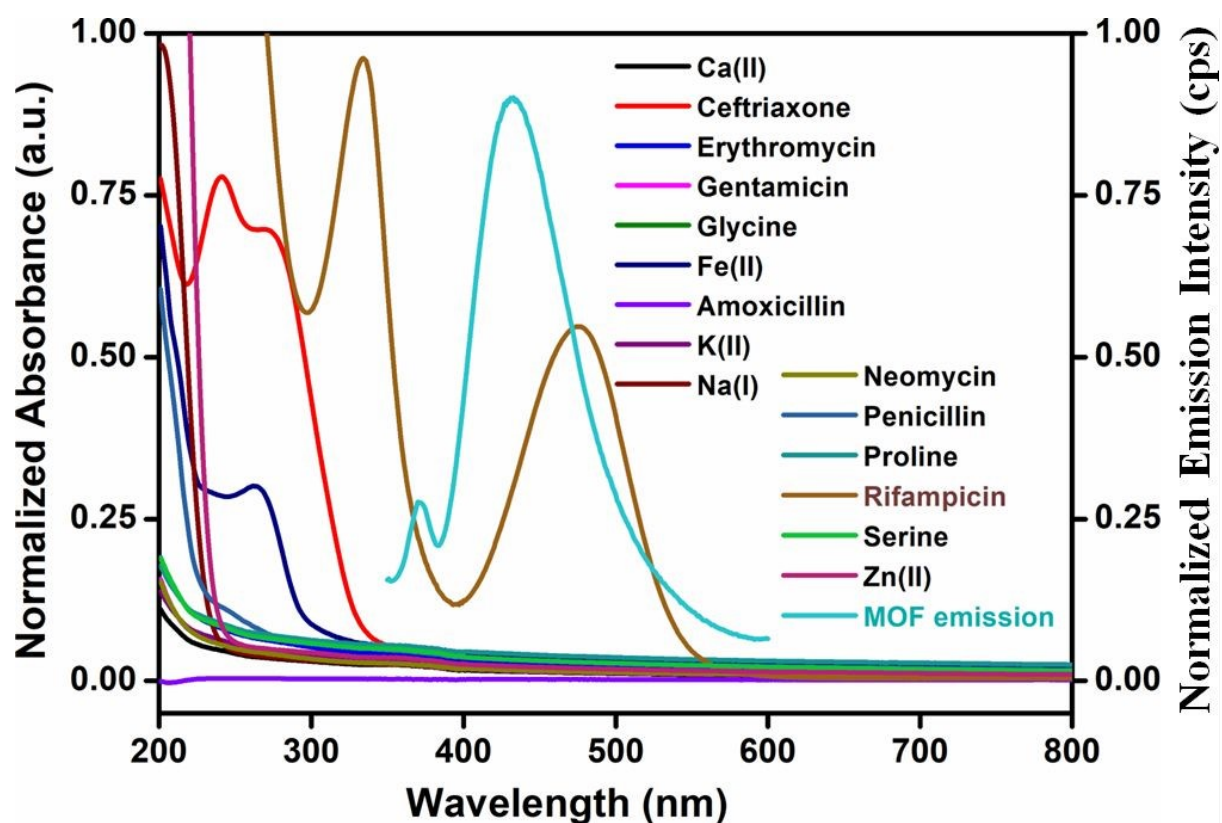

**Figure S44.** Overlap plot for UV-Vis spectra of all the analytes for rifampicin sensing with the fluorescence emission spectrum of **1'**.

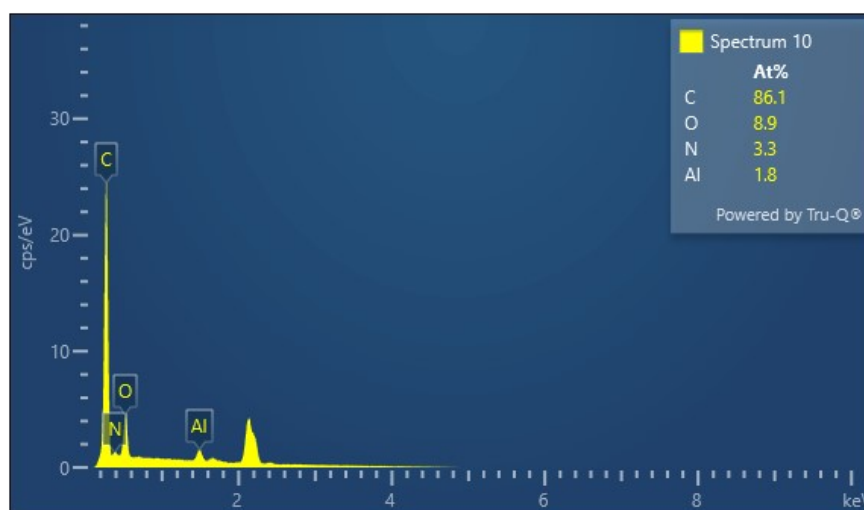

**Figure S45.** EDX elemental spectrum of **1'** after nitenpyram sensing.

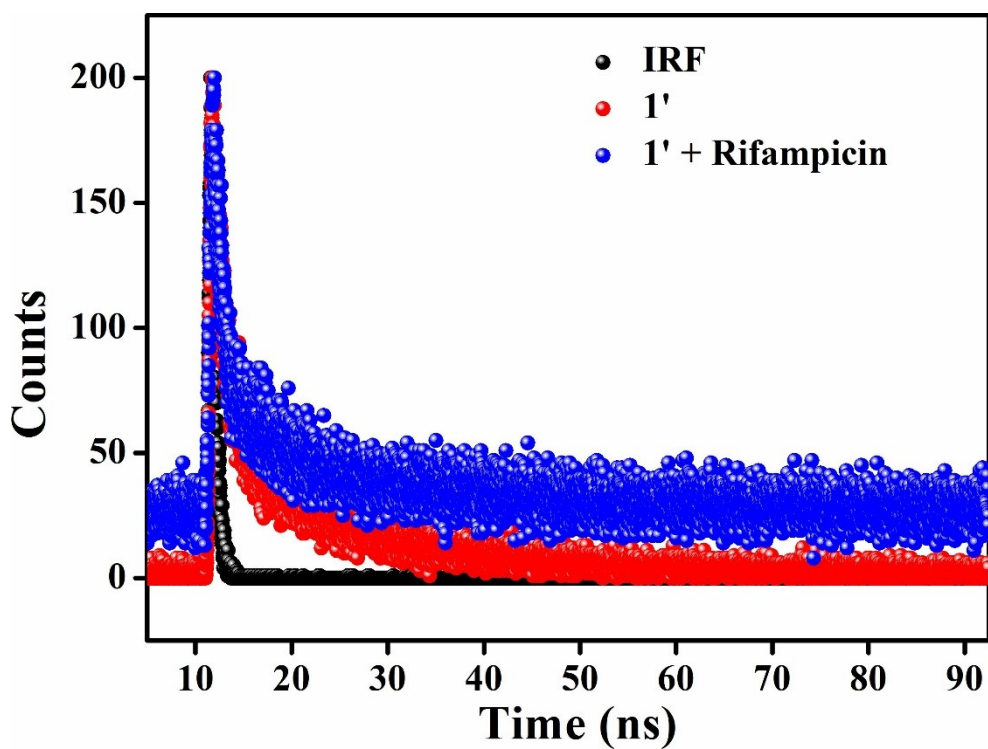

**Figure S46.** Time-resolved fluorescence lifetime decay plot for **1'** in presence and absence of nitenpyram.

**Table S10.** Excited-state lifetime of **1'** in presence and absence of nitenpyram.

| Volume of Nitenpyram Solution Added ( $\mu\text{L}$ ) | $B_1$ (%) | $B_2$ (%) | $T_1$ (ns) | $T_2$ (ns) | $\langle\tau\rangle^*$ (ns) | $\chi^2$ |
|-------------------------------------------------------|-----------|-----------|------------|------------|-----------------------------|----------|
| 0                                                     | 11.5      | 88.5      | 1.3        | 13.2       | 11.8                        | 1.19     |
| 300                                                   | 63.4      | 36.6      | 10.4       | 0.3        | 6.7                         | 1.09     |

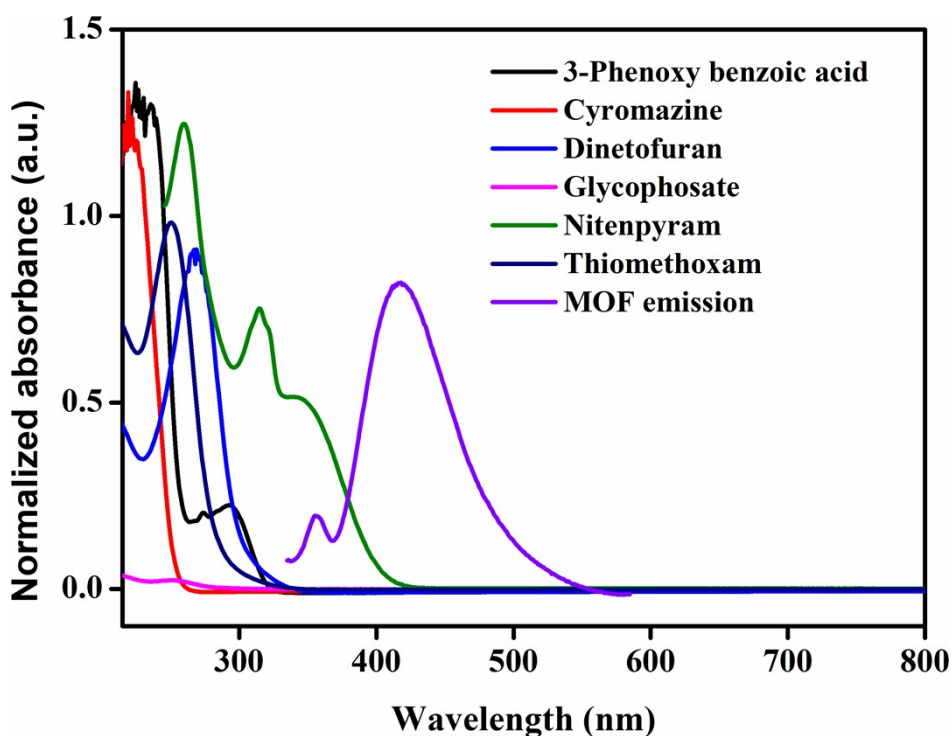

**Figure S47.** Overlap plot for UV-Vis spectra of analytes for nitenpyram sensing with the fluorescence emission spectrum of **1'**.

**Table S11.** Comparison table for fluorescence sensing performance of rifampicin by **1'** with previously reported materials.

| Sl. No | Sensor Material                                        | Material Type             | Sensing Medium | LOD (nM)     | Response Time (s) | $K_{sv}$ ( $M^{-1}$ ) | Ref.      |
|--------|--------------------------------------------------------|---------------------------|----------------|--------------|-------------------|-----------------------|-----------|
| 1      | FA-Cu NCs                                              | Nanocluster               | methanol       | 0.07 $\mu$ M | 20 s              | $5.1 \times 10^4$     | 2         |
| 2      | BSA-Au NCs                                             | Nanocluster               | water          | 0.09 $\mu$ M | 1800              | -                     | 3         |
| 3      | G-NSCDs                                                | Carbon dot                | water          | 0.06 $\mu$ M | 1800              | $1.2 \times 10^4$     | 4         |
| 4      | GSH-CdTe/ZnS QDs                                       | Quantum dot               | water          | 0.06 $\mu$ M | 900               | $4.4 \times 10^4$     | 5         |
| 5      | Ce-N-CQDs                                              | Cerium-Carbon Quantum dot | water          | 96 nM        | 300               | -                     | 6         |
| 6      | [Al(OH)(L)] $\cdot$ 0.5 H <sub>2</sub> O ( <b>1'</b> ) | MOF                       | water          | 11.7 nM      | 5                 | $1.8 \times 10^6$     | this work |

**Table S12.** Comparison table for MOF based fluorescence sensing performance of nitenpyram with **1'**.

| Sl. No | Sensor Material                                           | Sensing Medium | LOD            | Response Time (s) | $K_{sv}$ ( $M^{-1}$ )               | Ref.             |
|--------|-----------------------------------------------------------|----------------|----------------|-------------------|-------------------------------------|------------------|
| 1      | $[In_3Tb_3O_3(TATAB)_4(H_2O)_6] \cdot 12DMF \cdot 12H_2O$ | water          | 0.63 $\mu M$   | -                 | $1.5 \times 10^4$                   | 7                |
| 2      | FMOF                                                      | water          | 0.11 $\mu M$   | 1200              | -                                   | 8                |
| 3      | Dye@MOFs                                                  | water          | 0.27 $\mu M$   | -                 | -                                   | 9                |
| 4      | EY@Zr-MOF                                                 | water          | 1.18 $\mu M$   | -                 | $3.5 \times 10^4$                   | 10               |
| 5      | $[Al(OH)(L)] \cdot 0.5H_2O$ ( <b>1'</b> )                 | <b>water</b>   | <b>13.8 nM</b> | <b>5 s</b>        | <b><math>3.2 \times 10^6</math></b> | <b>this work</b> |

### References:

1. Das, A.; Anbu, N.; Sk, M.; Dhakshinamoorthy, A.; Biswas, S., Influence of hydrogen bond donating sites in UiO-66 metal-organic framework for highly regioselective methanolysis of epoxides. *ChemCatChem* **2020**, *12*, 1789-1798.
2. Zhang, Y.; Deng, Q.; Tang, C.; Zhang, M.; Huang, Z.; Cai, Z., Fluorescent folic acid-capped copper nanoclusters for the determination of rifampicin based on inner filter effect. *Spectrochim. Acta - A: Mol. Biomol. Spectrosc.* **2023**, *286*, 121944.
3. Chatterjee, K.; Kuo, C. W.; Chen, A.; Chen, P., Detection of residual rifampicin in urine via fluorescence quenching of gold nanoclusters on paper. *J. Nanobiotechnology* **2015**, *13*, 1-9.
4. Tang, X.; Zhao, Y.; Yu, H.; Cui, S.; Temple, H.; Amador, E.; Gao, Y.; Chen, M.-l.; Wang, S.; Hu, Z., Concentration-regulated multi-color fluorescent carbon dots for the detection of rifampicin, morin and  $Al^{3+}$ . *Mater. Today Adv.* **2023**, *18*, 100383.
5. Hooshyar, Z.; Bardajee, G. R., Fluorescence enhancement of glutathione capped CdTe/ZnS quantum dots by embedding into cationic starch for sensitive detection of rifampicin. *Spectrochim. Acta - A: Mol. Biomol. Spectrosc.* **2017**, *173*, 144-150.
6. Sun, X.-H.; Ma, M.; Tian, R.; Chai, H.-M.; Wang, J.-W.; Gao, L.-J., One-pot hydrothermal method preparation of cerium–nitrogen-codoped carbon quantum dots from waste longan nucleus as a fluorescent sensor for sensing drug rifampicin. *ACS omega* **2023**, *8*, 34859-34867.
7. Li, A.; Chu, Q.; Zhou, H.; Yang, Z.; Liu, B.; Zhang, J., Effective nitenpyram detection in a dual-walled nitrogen-rich In (iii)/Tb (iii)–organic framework. *Inorg. Chem. Front.* **2021**, *8*, 2341-2348.

8. Liu, J.; Xiong, W. H.; Ye, L. Y.; Zhang, W. S.; Yang, H., Developing a novel nanoscale porphyrinic metal–organic framework: A bifunctional platform with sensitive fluorescent detection and elimination of nitenpyram in agricultural environment. *J. Agric. Food Chem.* **2020**, *68*, 5572-5578.
9. Yang, L.; Liu, Y.-L.; Liu, C.-G.; Ye, F.; Fu, Y., Two luminescent dye@ MOFs systems as dual-emitting platforms for efficient pesticides detection. *J. Hazard. Mater.* **2020**, *381*, 120966.
10. Wei, Z.; Chen, D.; Guo, Z.; Jia, P.; Xing, H., Eosin Y-embedded zirconium-based metal–organic framework as a dual-emitting built-in self-calibrating platform for pesticide detection. *Inorg. Chem.* **2020**, *59* (8), 5386-5393.
